# Supplementary material for: Evolutionary conservation of the eumetazoan gene regulatory landscape
Source: HighWire-hosted journal article supplement (doi:10.1101/gr.162529.113), 2014-03-18
Supplement: Supplemental_Table4.xlsx [file Supplemental_Table4.xlsx]

## Sheet: Sheet1
scaffold	start	end	target gene	length	with hsp70a minimal promoter	orientation relative to transcription of target gene	expression	upstream(us) r downstream (ds) of mOrange2	mOrange2 expression domain	picture	# animals 14dpf	positive animals (per cent)
18	1170788	1173092	Ncx1	2305	+	rev	+	ds	neurons in mesenteries and tentacles	Figure 6A'	173	58.4
185	271206	272556	Nova	1351	+	fw	+	ds	neurons in mesenteries and tentacles	Figure 6B'	121	57.9
62	790321	794366	Rx	4046	-	fw	+	us	neurons in aboral ectoderm	Figure 6C'	139	6.5
106	422701	427201	Dpp	4500	-	fw	+	us	blastopore, asymetric in pharynx and endoderm	Figure 6D'	transgenic F1
137	291430	293291	Brachyury	1862	-	fw	+	us	blastopore	Figure 6E'	transgenic F1
53	144075	148254	Fz5	4180	+	rev	+	ds	aboral only	Figure 6G'	227	41
65	594581	598350	Tbx2/3	3770	+	rev	+	ds	pharynx	Figure 6H'	136	55.1
51	1118618	1122448	Fgf8A	3831	-	fw	+	us	pharynx	Figure 6I'	358	2
78	614271	617163	SoxB1	2893	+	fw	+	ds	pharynx	Figure 6F'	130	6.9
53	149876	152712	Fz5	2837	-	fw	+	us	aboral only	Figure 6G''	225	56.9
37	223045	223161	hsp70a	117	minimal promoter	fw	-	us	-		212	0
185	271206	272556	Nova	1351	+	fw	+	us	neurons in mesenteries and tentacles		320	61.9
65	594581	598350	Tbx2/3	3770	+	fw	+	us	pharynx		341	31.1
65	594581	598350	Tbx2/3	3770	+	rev	+	us	pharynx		229	28.4
65	597781	599741	Tbx2/3	1961	-	fw	+	us	pharynx and tentacles	Figure 6H''	242	35.5
78	621861	624134	SoxB1	2274	+	rev	-	ds	-		203	1
62	804246	809232	Otp	4987	+	fw	-	us	-		147	0
51	1116128	1117992	Fgf8A	1865	+	fw	+	ds	pharynx	Figure 6I''	218	2.3
18	1166285	1169230	Ncx1	2964	-	fw	-	us	-		212	0
18	1170788	1173092	Ncx1	2305	+	rev	+	us	neurons in mesenteries and tentacles		290	62.4
18	1170788	1173092	Ncx1	2305	+	fw	-	us	-		61	0
3	2015560	2018222	Obs	2663	-	fw	-	us	-		217	0
