# Supplementary material for: Evolutionary conservation of the eumetazoan gene regulatory landscape
Source: HighWire-hosted journal article supplement (doi:10.1101/gr.162529.113), 2014-03-18
Supplement: Supplemental_Table_3.xlsx [file Supplemental_Table_3.xlsx]

## Sheet: common_enhancer_noPol2_summits_
chr	start	end	summit	gene ID	distance to closest TSS	annotation	stage
scaffold_1	229370	229518	229444	g21	530	NA	gastrula
scaffold_1	230791	230939	230865	g21	1951	NA	gastrula
scaffold_1	275704	275936	275820	g26	564	eukaryotic translation initiation factor 4e	gastrula and planula
scaffold_1	300420	300652	300536	g28	828	NA	gastrula and planula
scaffold_1	314356	314588	314472	g31	1346	arginine kinase	gastrula and planula
scaffold_1	352422	352660	352541	g34	414	NA	gastrula
scaffold_1	352650	352888	352769	g34	642	NA	gastrula
scaffold_1	409433	409665	409549	g40	4154	NA	planula
scaffold_1	429916	430148	430032	g42	477	NA	planula
scaffold_1	470684	470916	470800	g43	39272	hemicentin 1	planula
scaffold_1	470933	471267	471100	g43	38921	hemicentin 1	planula
scaffold_1	473016	473248	473132	g43	36940	hemicentin 1	planula
scaffold_1	550323	550561	550442	g46	1176	NA	gastrula
scaffold_1	552947	553179	553063	g46	3800	NA	planula
scaffold_1	553123	553355	553239	g46	3976	NA	planula
scaffold_1	553447	553679	553563	g46	4300	NA	planula
scaffold_1	554064	554296	554180	g46	4917	NA	planula
scaffold_1	554411	554559	554485	g46	5264	NA	gastrula
scaffold_1	554567	554799	554683	g46	5420	NA	gastrula and planula
scaffold_1	609271	609509	609390	g52	4313	sodium-dependent neutral amino acid transporter b at2-like	gastrula
scaffold_1	695210	695442	695326	g60	1726	NA	planula
scaffold_1	695856	696190	696023	g60	978	NA	planula
scaffold_1	721511	721749	721630	g61	10613	anoctamin-7	gastrula
scaffold_1	723048	723196	723122	g61	12150	anoctamin-7	gastrula
scaffold_1	785879	786111	785995	aug11_g69	1634	glycoprotein 3-alpha-l-fucosyltransferase a	gastrula and planula
scaffold_1	806879	807111	806995	g65	822	NA	planula
scaffold_1	941255	941487	941371	g84	2017	NA	planula
scaffold_1	995163	995311	995237	g89	400	kinesin family member 27	gastrula
scaffold_1	1063162	1063394	1063278	g95	8381	NA	planula
scaffold_1	1064076	1064308	1064192	g95	9295	NA	planula
scaffold_1	1065923	1066155	1066039	g96	8225	isoform cra_a	planula
scaffold_1	1070842	1071074	1070958	g96	3306	isoform cra_a	planula
scaffold_1	1071779	1072011	1071895	g96	2369	isoform cra_a	planula
scaffold_1	1072620	1072852	1072736	g96	1528	isoform cra_a	planula
scaffold_1	1072912	1073150	1073031	g96	1230	isoform cra_a	gastrula
scaffold_1	1075053	1075285	1075169	g96	673	isoform cra_a	gastrula and planula
scaffold_1	1075402	1075634	1075518	g96	1022	isoform cra_a	planula
scaffold_1	1116213	1116547	1116380	g97	633	NA	planula
scaffold_1	1139347	1139579	1139463	g102	1012	echinoderm microtubule associated protein like 1	planula
scaffold_1	1164662	1164894	1164778	g104	602	NA	planula
scaffold_1	1236096	1236328	1236212	g110	8236	wd repeat domain 32	planula
scaffold_1	1236791	1237023	1236907	g110	7541	wd repeat domain 32	planula
scaffold_1	1237331	1237563	1237447	g110	7001	wd repeat domain 32	planula
scaffold_1	1239328	1239560	1239444	g110	5004	wd repeat domain 32	planula
scaffold_1	1276572	1276810	1276691	g114	1364	NA	gastrula
scaffold_1	1278660	1278892	1278776	g114	486	NA	gastrula and planula
scaffold_1	1470064	1470398	1470231	g130	1117	lim domain and actin-binding protein 1	gastrula and planula
scaffold_1	1470947	1471185	1471066	g130	330	lim domain and actin-binding protein 1	gastrula
scaffold_1	1486101	1486333	1486217	g131	7636	NA	planula
scaffold_1	1603198	1603436	1603317	g136	5086	synaptotagmin- partial	gastrula
scaffold_1	1769629	1769861	1769745	g152	4493	NA	planula
scaffold_1	1891290	1891522	1891406	g161	576	spondin extracellular matrix protein	planula
scaffold_1	1891721	1891953	1891837	g161	1007	spondin extracellular matrix protein	gastrula and planula
scaffold_1	1892695	1892843	1892769	g161	1981	spondin extracellular matrix protein	gastrula
scaffold_1	1895906	1896138	1896022	g161	5192	spondin extracellular matrix protein	planula
scaffold_1	1914209	1914447	1914328	g162	1286	NA	gastrula
scaffold_1	1914510	1914658	1914584	g162	1587	NA	gastrula
scaffold_1	2029182	2029330	2029256	g172	900	NA	gastrula
scaffold_1	2029659	2029891	2029775	g172	339	NA	gastrula and planula
scaffold_1	2049264	2049496	2049380	g175	1284	ca2+ calmodulin-dependent protein kinase ii	planula
scaffold_1	2092375	2092607	2092491	g178	5893	hrh2 protein	planula
scaffold_1	2096360	2096592	2096476	g178	1908	hrh2 protein	planula
scaffold_1	2105455	2105687	2105571	g178	6955	hrh2 protein	planula
scaffold_1	2105617	2105849	2105733	g178	7117	hrh2 protein	planula
scaffold_1	2107150	2107382	2107266	g178	8650	hrh2 protein	planula
scaffold_1	2107527	2107759	2107643	g178	9027	hrh2 protein	gastrula and planula
scaffold_1	2134062	2134300	2134181	g179	2193	heat shock 70 kda protein 14	gastrula
scaffold_1	2134317	2134651	2134484	g179	2448	heat shock 70 kda protein 14	planula
scaffold_1	2163130	2163362	2163246	g182	2861	NA	gastrula and planula
scaffold_1	2163714	2163946	2163830	g182	3445	NA	planula
scaffold_1	2213592	2213824	2213708	aug11_g215	36864	NA	planula
scaffold_1	2221210	2221442	2221326	aug11_g215	29246	NA	planula
scaffold_1	2236628	2236776	2236702	aug11_g215	13912	NA	gastrula
scaffold_1	2256962	2257194	2257078	g186	603	isoform cra_a	planula
scaffold_1	2309184	2309416	2309300	aug11_g220	11426	neuropeptide ff receptor 1-like	planula
scaffold_1	2309533	2309765	2309649	aug11_g220	11077	neuropeptide ff receptor 1-like	planula
scaffold_1	2313051	2313283	2313167	aug11_g220	7559	neuropeptide ff receptor 1-like	planula
scaffold_1	2361006	2361238	2361122	g192	481	cyclin-dependent kinase inhibitor 1b	gastrula and planula
scaffold_1	2362045	2362283	2362164	g192	1520	cyclin-dependent kinase inhibitor 1b	gastrula
scaffold_1	2363428	2363660	2363544	g192	2903	cyclin-dependent kinase inhibitor 1b	gastrula and planula
scaffold_1	2364042	2364280	2364161	g192	3517	cyclin-dependent kinase inhibitor 1b	gastrula
scaffold_1	2544158	2544306	2544232	g207	25572	NA	gastrula
scaffold_1	2625819	2626057	2625938	g211	1643	wd-40 repeat protein	gastrula
scaffold_1	2664702	2664934	2664818	g213	2631	NA	gastrula and planula
scaffold_1	2665162	2665394	2665278	g213	2171	NA	gastrula and planula
scaffold_1	2720093	2720325	2720209	g217	14077	mandelate racemase muconate lactonizing protein	planula
scaffold_1	2721139	2721287	2721213	g218	14638	NA	gastrula
scaffold_1	2747762	2747994	2747878	g218	11837	NA	planula
scaffold_1	2748649	2748881	2748765	g218	12724	NA	planula
scaffold_1	2751714	2751946	2751830	g218	15789	NA	planula
scaffold_1	2926880	2927112	2926996	g235	1240	NA	planula
scaffold_1	2942823	2943055	2942939	g237	505	bone morphogenetic protein 1-like	planula
scaffold_10	80097	80329	80213	g2061	1542	NA	gastrula and planula
scaffold_10	81634	81968	81801	g2061	3079	NA	planula
scaffold_10	92644	92876	92760	g2064	619	tropomyosin beta chain	planula
scaffold_10	104480	104814	104647	g2066	1235	NA	planula
scaffold_10	154300	154532	154416	g2070	8894	NA	gastrula and planula
scaffold_10	154637	154869	154753	g2070	8557	NA	planula
scaffold_10	213731	213963	213847	g2080	545	ras-related protein rab-37-like	planula
scaffold_10	376336	376568	376452	g2095	1068	mical-like protein 2-like	gastrula and planula
scaffold_10	376856	377088	376972	g2095	548	mical-like protein 2-like	planula
scaffold_10	550182	550414	550298	g2104	915	NA	planula
scaffold_10	551713	551945	551829	g2104	384	NA	planula
scaffold_10	662208	662440	662324	g2115	2190	NA	planula
scaffold_10	662496	662728	662612	g2115	1902	NA	planula
scaffold_10	663541	663773	663657	g2115	857	NA	gastrula and planula
scaffold_10	666203	666435	666319	g2115	1573	NA	planula
scaffold_10	666813	667147	666980	g2115	2183	NA	planula
scaffold_10	667877	668109	667993	g2115	3247	NA	gastrula and planula
scaffold_10	737162	737394	737278	g2119	590	NA	planula
scaffold_10	737734	737966	737850	g2120	477	NA	gastrula and planula
scaffold_10	737880	738112	737996	g2120	331	NA	gastrula and planula
scaffold_10	816249	816487	816368	g2123	485	NA	gastrula
scaffold_10	829526	829758	829642	g2126	1135	NA	planula
scaffold_10	883642	883874	883758	g2132	1544	NA	gastrula and planula
scaffold_10	884817	885055	884936	g2132	363	NA	gastrula
scaffold_10	1095155	1095387	1095271	g2147	8519	isoform a	planula
scaffold_10	1105532	1105764	1105648	g2147	1626	isoform a	planula
scaffold_10	1106186	1106418	1106302	g2147	2280	isoform a	planula
scaffold_10	1231184	1231416	1231300	g2156	20928	NA	planula
scaffold_10	1241671	1241903	1241787	g2157	15122	caskin1 protein	planula
scaffold_10	1244579	1244811	1244695	g2157	12214	caskin1 protein	planula
scaffold_10	1257424	1257656	1257540	g2157	399	caskin1 protein	planula
scaffold_10	1420082	1420320	1420201	g2165	349	protein lethal giant larvae-like	gastrula
scaffold_10	1502025	1502257	1502141	g2176	1511	neuropeptide y receptor-like	planula
scaffold_10	1642128	1642360	1642244	g2179	1198	protein	planula
scaffold_10	1645445	1645677	1645561	g2179	1887	protein	planula
scaffold_10	1713924	1714156	1714040	g2186	1606	NA	gastrula and planula
scaffold_10	1727061	1727293	1727177	g2187	859	NA	gastrula and planula
scaffold_10	1786736	1786884	1786810	g2193	333	NA	gastrula
scaffold_10	1828263	1828597	1828430	g2196	6830	NA	planula
scaffold_10	1885482	1885714	1885598	g2198	1924	NA	planula
scaffold_10	1887971	1888203	1888087	g2198	333	NA	planula
scaffold_10	1888460	1888692	1888576	g2198	822	NA	planula
scaffold_10	1944005	1944237	1944121	g2199	1301	NA	planula
scaffold_10	1960085	1960317	1960201	g2200	871	NA	planula
scaffold_10	2070077	2070309	2070193	g2209	10250	charged multivesicular body protein 6	gastrula and planula
scaffold_100	272572	272804	272688	g11127	337	solute carrier family 1 (glial high affinity glutamate transporter) member 3	planula
scaffold_100	340218	340456	340337	g11131	523	NA	gastrula
scaffold_100	341810	342042	341926	g11131	2115	NA	gastrula and planula
scaffold_100	354366	354598	354482	aug11_g13049	1193	NA	gastrula and planula
scaffold_100	427760	427908	427834	g11139	5501	lysine-specific demethylase phf2-like isoform 2	gastrula
scaffold_100	483271	483503	483387	g11141	337	ras-like gtp-binding protein rho	gastrula and planula
scaffold_100	520556	520704	520630	g11145	5141	n-acyl-phosphatidylethanolamine-hydrolyzing phospholipase d	gastrula
scaffold_100	669329	669561	669445	g11155	1094	e3 ubiquitin-protein ligase rad18	planula
scaffold_100	676195	676427	676311	g11156	570	rap guanine nucleotide exchange factor 1	gastrula and planula
scaffold_100	763938	764170	764054	g11164	4679	NA	gastrula and planula
scaffold_101	199602	199840	199721	aug11_g13104	2019	hypothetical protein BRAFLDRAFT_127392 [Branchiostoma floridae]	gastrula
scaffold_101	321167	321399	321283	g11194	1867	NA	gastrula and planula
scaffold_101	323839	324071	323955	g11194	573	NA	planula
scaffold_101	711810	712042	711926	g11226	548	nitric oxide brain	gastrula and planula
scaffold_101	712112	712344	712228	g11226	850	nitric oxide brain	planula
scaffold_102	44915	45153	45034	g11237	452	very long-chain specific acyl- mitochondrial isoform 1 precursor	gastrula
scaffold_102	65329	65477	65403	g11239	4074	NA	gastrula
scaffold_102	120593	120825	120709	g11244	3431	NA	planula
scaffold_102	121280	121512	121396	g11244	2744	NA	planula
scaffold_102	204265	204497	204381	g11252	1988	lysine-specific demethylase 6a	planula
scaffold_102	204542	204774	204658	g11252	1711	lysine-specific demethylase 6a	planula
scaffold_102	232113	232345	232229	g11253	529	homeobox protein	gastrula and planula
scaffold_102	232925	233157	233041	g11253	1341	homeobox protein	gastrula and planula
scaffold_102	298395	298627	298511	g11262	330	upstream transcription factor c-fos interacting	gastrula and planula
scaffold_102	481302	481534	481418	g11274	577	NA	gastrula and planula
scaffold_102	648709	648947	648828	g11289	1303	NA	gastrula
scaffold_102	650629	650867	650748	g11289	379	NA	gastrula
scaffold_102	681955	682187	682071	g11293	2753	atp-binding cassette sub-family g member 1	planula
scaffold_102	683137	683369	683253	g11293	1571	atp-binding cassette sub-family g member 1	planula
scaffold_102	683601	683833	683717	g11293	1107	atp-binding cassette sub-family g member 1	gastrula and planula
scaffold_102	693900	694132	694016	g11294	4580	NA	planula
scaffold_102	694285	694523	694404	g11294	4965	NA	gastrula
scaffold_102	703304	703536	703420	g11295	3084	hormone-sensitive lipase-like	planula
scaffold_103	219469	219617	219543	g11322	327	ataxin-2	gastrula
scaffold_103	237760	237992	237876	g11325	795	NA	planula
scaffold_103	372173	372507	372340	g11330	710	NA	planula
scaffold_103	375035	375267	375151	g11331	1261	NA	gastrula and planula
scaffold_103	377161	377309	377235	g11331	633	NA	gastrula
scaffold_103	417056	417288	417172	g11334	2699	NA	planula
scaffold_103	440368	440600	440484	g11337	318	NA	planula
scaffold_103	472890	473128	473009	g11340	3183	NA	gastrula
scaffold_103	540495	540727	540611	aug11_g13297	1065	NA	planula
scaffold_103	542227	542459	542343	aug11_g13297	435	NA	planula
scaffold_103	555658	555806	555732	g11347	856	calcium transporter 2	gastrula
scaffold_103	608091	608425	608258	g11352	530	NA	planula
scaffold_103	610019	610251	610135	g11353	2270	NA	gastrula and planula
scaffold_103	610565	610797	610681	g11353	1724	NA	planula
scaffold_1039	8945	9279	9112	g21791	847	NA	planula
scaffold_1039	11119	11351	11235	g21791	993	NA	gastrula and planula
scaffold_104	144721	144953	144837	g11369	462	NA	planula
scaffold_104	146125	146357	146241	g11369	710	NA	gastrula and planula
scaffold_104	149620	149852	149736	g11370	3243	NA	planula
scaffold_104	152158	152390	152274	g11370	705	NA	gastrula and planula
scaffold_104	153518	153750	153634	g11370	423	NA	gastrula and planula
scaffold_104	154205	154437	154321	g11370	1110	NA	gastrula and planula
scaffold_104	283886	284118	284002	g11382	1613	NA	planula
scaffold_104	284761	284993	284877	g11382	738	NA	planula
scaffold_104	285140	285372	285256	g11382	359	NA	planula
scaffold_104	379577	379809	379693	g11391	1337	NA	gastrula and planula
scaffold_104	380232	380464	380348	g11391	682	NA	planula
scaffold_104	380483	380721	380602	g11391	425	NA	gastrula
scaffold_104	383491	383723	383607	g11391	2345	NA	planula
scaffold_104	385326	385558	385442	g11391	4180	NA	planula
scaffold_104	386744	387078	386911	g11391	5598	NA	gastrula and planula
scaffold_104	652854	653092	652973	g11412	9622	NA	gastrula
scaffold_104	674540	674874	674707	g11413	11366	NA	planula
scaffold_104	674942	675276	675109	g11413	11768	NA	planula
scaffold_105	86569	86801	86685	g11418	5874	NA	planula
scaffold_105	279573	279811	279692	g11434	18221	NA	gastrula
scaffold_105	363937	364169	364053	g11439	5465	potassium channel	planula
scaffold_105	418615	418847	418731	aug11_g13408	554	NA	gastrula and planula
scaffold_105	418813	419045	418929	aug11_g13408	356	NA	gastrula and planula
scaffold_105	454983	455215	455099	aug11_g13411	1039	isoform cra_a	planula
scaffold_105	455267	455499	455383	aug11_g13411	755	isoform cra_a	planula
scaffold_105	457239	457471	457355	aug11_g13411	985	isoform cra_a	planula
scaffold_105	460410	460558	460484	g11447	314	tumor susceptibility gene 101	gastrula
scaffold_105	548196	548344	548270	aug11_g13420	9131	neuropeptide ff receptor 2	gastrula
scaffold_105	548580	548812	548696	aug11_g13420	8663	neuropeptide ff receptor 2	planula
scaffold_105	721237	721469	721353	g11472	786	NA	gastrula and planula
scaffold_105	724931	725169	725050	g11472	2676	NA	gastrula
scaffold_106	2811	3043	2927	g11475	1262	calmodulin-like 3	planula
scaffold_106	46856	47190	47023	g11480	8505	NA	gastrula and planula
scaffold_106	393042	393274	393158	g11516	6429	visual system homeobox 2-like	planula
scaffold_106	394083	394231	394157	g11516	5472	visual system homeobox 2-like	gastrula
scaffold_106	398213	398547	398380	g11516	1156	visual system homeobox 2-like	gastrula and planula
scaffold_106	406643	406881	406762	g11517	993	NA	gastrula
scaffold_106	416323	416555	416439	g11518	6699	bone morphogenetic protein 4	planula
scaffold_106	417569	417801	417685	g11518	5453	bone morphogenetic protein 4	planula
scaffold_106	422061	422293	422177	g11518	961	bone morphogenetic protein 4	gastrula and planula
scaffold_106	423811	424043	423927	g11518	557	bone morphogenetic protein 4	gastrula and planula
scaffold_106	426100	426332	426216	g11518	2846	bone morphogenetic protein 4	planula
scaffold_106	426383	426615	426499	g11518	3129	bone morphogenetic protein 4	gastrula and planula
scaffold_106	426757	426989	426873	g11518	3503	bone morphogenetic protein 4	planula
scaffold_106	513738	513970	513854	g11529	404	acetyl-coenzyme a synthetase 2- mitochondrial-like	planula
scaffold_106	608064	608302	608183	aug11_g13521	850	NA	gastrula
scaffold_106	681049	681281	681165	g11544	676	NA	planula
scaffold_107	41245	41477	41361	g11547	10680	NA	planula
scaffold_107	307267	307415	307341	aug11_g13548	328	5-hydroxytryptamine receptor 4-like	gastrula
scaffold_107	307508	307740	307624	aug11_g13548	569	5-hydroxytryptamine receptor 4-like	gastrula and planula
scaffold_108	235591	235823	235707	g11611	806	single stranded dna binding protein 3	planula
scaffold_108	263618	263850	263734	g11613	558	coagulation factor ix	planula
scaffold_108	503782	504014	503898	g11636	2861	NA	gastrula and planula
scaffold_108	596590	596822	596706	g11641	312	NA	planula
scaffold_108	620247	620479	620363	g11643	2799	cyclopropane-fatty-acyl-phospholipid synthase	planula
scaffold_108	620692	620924	620808	g11643	2354	cyclopropane-fatty-acyl-phospholipid synthase	planula
scaffold_108	621715	621947	621831	g11643	1331	cyclopropane-fatty-acyl-phospholipid synthase	planula
scaffold_108	621983	622215	622099	g11643	1063	cyclopropane-fatty-acyl-phospholipid synthase	gastrula and planula
scaffold_108	622192	622424	622308	g11643	854	cyclopropane-fatty-acyl-phospholipid synthase	gastrula and planula
scaffold_108	622478	622710	622594	g11643	568	cyclopropane-fatty-acyl-phospholipid synthase	planula
scaffold_108	689894	690126	690010	g11647	4091	NA	planula
scaffold_109	55600	55832	55716	g11652	344	ferm domain-containing protein 4a	planula
scaffold_109	103855	104087	103971	aug11_g13656	560	mitochondrial import inner membrane translocase subunit tim8 a	planula
scaffold_109	134270	134502	134386	g11658	464	NA	planula
scaffold_109	144857	145089	144973	g11659	1552	NA	planula
scaffold_109	145301	145533	145417	aug11_g13661	1713	orphan g protein-coupled receptor ren 1	planula
scaffold_109	303281	303429	303355	g11667	1648	NA	gastrula
scaffold_109	369856	370088	369972	g11672	3156	NA	planula
scaffold_109	470207	470439	470323	g11677	2008	neuroligin- x-linked	gastrula and planula
scaffold_109	470460	470692	470576	g11677	1755	neuroligin- x-linked	planula
scaffold_109	471156	471388	471272	g11677	1059	neuroligin- x-linked	gastrula and planula
scaffold_109	472957	473189	473073	g11678	409	NA	planula
scaffold_109	473637	473869	473753	g11678	1089	NA	gastrula and planula
scaffold_109	645410	645642	645526	g11691	1652	nuclear receptor subfamily 2 group c member 2	planula
scaffold_109	645644	645876	645760	g11691	1418	nuclear receptor subfamily 2 group c member 2	planula
scaffold_11	54212	54360	54286	g2219	1847	NA	gastrula
scaffold_11	54471	54709	54590	g2219	2106	NA	gastrula
scaffold_11	160403	160635	160519	g2227	6477	NA	planula
scaffold_11	193635	193969	193802	g2232	4128	NA	planula
scaffold_11	205200	205432	205316	g2234	2745	pdz and lim domain 5	planula
scaffold_11	205692	205924	205808	g2234	2253	pdz and lim domain 5	planula
scaffold_11	207506	207738	207622	g2234	439	pdz and lim domain 5	planula
scaffold_11	280216	280364	280290	g2240	1290	protein fam13a-like	gastrula
scaffold_11	283106	283344	283225	g2241	3583	bifunctional 3 -phosphoadenosine 5 -phosphosulfate synthase 1	gastrula
scaffold_11	284612	284844	284728	g2241	2083	bifunctional 3 -phosphoadenosine 5 -phosphosulfate synthase 1	planula
scaffold_11	307959	308191	308075	g2243	703	forkhead box-containing transcription factor	planula
scaffold_11	355615	355847	355731	aug11_g2543	1558	NA	gastrula and planula
scaffold_11	383291	383523	383407	g2248	734	NA	planula
scaffold_11	408587	408819	408703	g2251	12238	dna-binding protein rfx6	planula
scaffold_11	409394	409626	409510	g2251	11431	dna-binding protein rfx6	planula
scaffold_11	409964	410196	410080	g2251	10861	dna-binding protein rfx6	planula
scaffold_11	414770	415002	414886	g2251	6055	dna-binding protein rfx6	gastrula and planula
scaffold_11	415998	416236	416117	g2251	4821	dna-binding protein rfx6	gastrula
scaffold_11	417193	417425	417309	g2251	3632	dna-binding protein rfx6	gastrula and planula
scaffold_11	418947	419179	419063	g2251	1878	dna-binding protein rfx6	planula
scaffold_11	419135	419367	419251	g2251	1690	dna-binding protein rfx6	planula
scaffold_11	467030	467262	467146	g2258	373	NA	planula
scaffold_11	468467	468699	468583	g2258	1810	NA	planula
scaffold_11	571994	572226	572110	g2268	5780	potassium voltage-gated channel subfamily a member 3	gastrula and planula
scaffold_11	598800	599032	598916	g2272	1333	NA	planula
scaffold_11	656152	656384	656268	g2277	3805	voltage-dependent calcium channel type a subunit alpha-1	planula
scaffold_11	696090	696322	696206	g2279	450	protein yipf3	planula
scaffold_11	785298	785536	785417	g2285	11724	NA	gastrula
scaffold_11	786040	786272	786156	g2285	10988	NA	planula
scaffold_11	831041	831273	831157	g2288	2421	NA	planula
scaffold_11	831658	831890	831774	g2288	3038	NA	gastrula and planula
scaffold_11	874186	874418	874302	g2291	981	isoform a	gastrula and planula
scaffold_11	898562	898794	898678	g2294	5520	NA	planula
scaffold_11	936572	936810	936691	g2298	414	NA	gastrula
scaffold_11	1023770	1024008	1023889	g2302	8221	NA	gastrula
scaffold_11	1024650	1024882	1024766	g2302	9101	NA	gastrula and planula
scaffold_11	1101633	1101865	1101749	g2310	574	NA	gastrula and planula
scaffold_11	1145011	1145249	1145130	g2315	383	ankyrin repeat protein	gastrula
scaffold_11	1201194	1201528	1201361	g2324	729	synaptotagmin-14 isoform 2	planula
scaffold_11	1202745	1202983	1202864	g2325	327	NA	gastrula
scaffold_11	1203089	1203321	1203205	g2325	671	NA	planula
scaffold_11	1203763	1203995	1203879	g2325	1345	NA	gastrula and planula
scaffold_11	1204256	1204404	1204330	g2325	1838	NA	gastrula
scaffold_11	1205073	1205305	1205189	g2325	2655	NA	gastrula and planula
scaffold_11	1206122	1206354	1206238	g2325	3704	NA	gastrula and planula
scaffold_11	1223790	1224022	1223906	g2328	2043	NA	gastrula and planula
scaffold_11	1230057	1230289	1230173	g2329	798	NA	planula
scaffold_11	1364322	1364554	1364438	g2341	5708	NA	planula
scaffold_11	1366278	1366510	1366394	g2341	3752	NA	planula
scaffold_11	1368380	1368612	1368496	g2341	1650	NA	gastrula and planula
scaffold_11	1368624	1368856	1368740	g2341	1406	NA	gastrula and planula
scaffold_11	1380012	1380346	1380179	g2342	8906	coatomer protein subunit beta 2 (beta prime)	planula
scaffold_11	1557949	1558181	1558065	g2356	1837	ankyrin domain protein	planula
scaffold_110	26731	26963	26847	g11697	3583	NA	gastrula and planula
scaffold_110	28660	28892	28776	g11697	1654	NA	planula
scaffold_110	65612	65760	65686	g11701	686	ammonium transporter-like protein	gastrula
scaffold_110	247331	247563	247447	g11710	20267	prominin- splice variant	gastrula and planula
scaffold_110	275859	276091	275975	g11710	8029	prominin- splice variant	gastrula and planula
scaffold_110	276388	276620	276504	g11710	8558	prominin- splice variant	gastrula and planula
scaffold_110	377946	378094	378020	g11720	770	aristaless-like homeobox protein	gastrula
scaffold_110	378330	378562	378446	g11720	302	aristaless-like homeobox protein	planula
scaffold_110	379761	379993	379877	g11720	897	aristaless-like homeobox protein	planula
scaffold_110	444269	444501	444385	aug11_g13759	1382	---NA---	gastrula and planula
scaffold_110	522698	522930	522814	g11730	1094	br serine threonine-protein kinase 2-like	planula
scaffold_110	531482	531714	531598	g11730	9878	br serine threonine-protein kinase 2-like	planula
scaffold_111	30469	30701	30585	g11742	1114	NA	planula
scaffold_111	110438	110670	110554	g11748	315	NA	planula
scaffold_111	119677	119909	119793	g11749	3496	NA	gastrula and planula
scaffold_111	121401	121735	121568	g11749	1670	NA	gastrula and planula
scaffold_111	123717	123949	123833	g11749	312	NA	planula
scaffold_111	152784	153016	152900	aug11_g13807	2859	uncharacterized protein c9orf172-like	gastrula and planula
scaffold_111	154328	154560	154444	aug11_g13807	1315	uncharacterized protein c9orf172-like	gastrula and planula
scaffold_111	157195	157427	157311	g11756	1109	down syndrome cell adhesion molecule	gastrula and planula
scaffold_111	157487	157719	157603	g11756	817	down syndrome cell adhesion molecule	planula
scaffold_111	185734	185966	185850	g11757	5217	NA	planula
scaffold_111	188893	189125	189009	g11757	8376	NA	planula
scaffold_111	319893	320125	320009	g11772	9462	tnf receptor-associated factor 3	gastrula and planula
scaffold_111	329949	330181	330065	g11772	362	tnf receptor-associated factor 3	planula
scaffold_111	330139	330371	330255	g11772	552	tnf receptor-associated factor 3	planula
scaffold_111	348326	348558	348442	aug11_g13827	12230	NA	gastrula and planula
scaffold_111	349668	349816	349742	aug11_g13827	10972	NA	gastrula
scaffold_111	350164	350396	350280	aug11_g13827	10392	NA	planula
scaffold_111	433255	433487	433371	aug11_g13835	1347	tachykinin-like peptides receptor 99d-like	planula
scaffold_111	433540	433772	433656	aug11_g13835	1632	tachykinin-like peptides receptor 99d-like	planula
scaffold_111	445071	445303	445187	g11779	805	NA	planula
scaffold_111	541803	542035	541919	g11790	1113	NA	planula
scaffold_111	574826	575058	574942	g11793	1039	NA	gastrula and planula
scaffold_111	575113	575345	575229	g11793	752	NA	gastrula and planula
scaffold_111	612396	612628	612512	aug11_g13854	9083	beta-2-adrenergic receptor	planula
scaffold_111	658407	658555	658481	aug11_g13859	307	NA	gastrula
scaffold_112	51845	52077	51961	g11801	1909	tnf receptor-associated factor 3 isoform 1	planula
scaffold_112	52497	52729	52613	g11801	1257	tnf receptor-associated factor 3 isoform 1	planula
scaffold_112	57930	58162	58046	g11801	3944	tnf receptor-associated factor 3 isoform 1	gastrula and planula
scaffold_112	58143	58375	58259	g11801	4157	tnf receptor-associated factor 3 isoform 1	gastrula and planula
scaffold_112	157559	157893	157726	g11810	802	NA	gastrula and planula
scaffold_112	546458	546690	546574	g11842	4773	NA	planula
scaffold_112	547079	547311	547195	g11842	4152	NA	planula
scaffold_112	547886	548118	548002	g11842	3345	NA	gastrula and planula
scaffold_112	548971	549209	549090	g11842	2254	NA	gastrula
scaffold_112	549194	549432	549313	g11842	2031	NA	gastrula
scaffold_112	550554	550792	550673	g11842	671	NA	gastrula
scaffold_112	550903	551135	551019	g11842	328	NA	planula
scaffold_112	568161	568393	568277	g11844	2247	NA	planula
scaffold_112	625188	625420	625304	g11848	1043	NA	planula
scaffold_113	107127	107359	107243	g11858	1471	NA	gastrula and planula
scaffold_113	143527	143861	143694	g11861	1362	histone-lysine n-methyltransferase prdm6-like	gastrula and planula
scaffold_113	144352	144584	144468	g11861	2187	histone-lysine n-methyltransferase prdm6-like	gastrula and planula
scaffold_113	144682	144920	144801	g11861	2517	histone-lysine n-methyltransferase prdm6-like	gastrula
scaffold_113	145197	145429	145313	g11861	3032	histone-lysine n-methyltransferase prdm6-like	gastrula and planula
scaffold_113	145515	145753	145634	g11861	3350	histone-lysine n-methyltransferase prdm6-like	gastrula
scaffold_113	172483	172715	172599	g11862	950	transmembrane protease serine 6	planula
scaffold_113	426782	427014	426898	g11880	5053	NA	planula
scaffold_114	34658	34896	34777	g11895	7472	NA	gastrula
scaffold_114	67063	67295	67179	g11896	920	calponin transgelin	planula
scaffold_114	67350	67582	67466	g11896	633	calponin transgelin	planula
scaffold_114	123060	123292	123176	g11903	574	NA	planula
scaffold_114	124935	125167	125051	g11903	1069	NA	planula
scaffold_114	145380	145612	145496	g11904	12513	NA	gastrula and planula
scaffold_114	146582	146814	146698	g11904	11311	NA	gastrula and planula
scaffold_114	148009	148241	148125	g11904	9884	NA	gastrula and planula
scaffold_114	148406	148554	148480	g11904	9571	NA	gastrula
scaffold_114	148671	148903	148787	g11904	9222	NA	gastrula and planula
scaffold_114	149559	149791	149675	g11904	8334	NA	planula
scaffold_114	150089	150423	150256	g11904	7702	NA	planula
scaffold_114	151501	151733	151617	g11904	6392	NA	gastrula and planula
scaffold_114	156229	156563	156396	g11904	1562	NA	gastrula and planula
scaffold_114	156610	156842	156726	g11904	1283	NA	gastrula and planula
scaffold_114	170030	170262	170146	aug11_g13990	1733	NA	planula
scaffold_114	170265	170497	170381	aug11_g13990	1498	NA	planula
scaffold_114	177201	177433	177317	aug11_g13990	5206	NA	gastrula and planula
scaffold_114	177679	177917	177798	aug11_g13990	5684	NA	gastrula
scaffold_114	199689	200023	199856	g11905	1173	ankyrin-2 isoform 2	planula
scaffold_114	331669	331901	331785	g11915	11854	NA	planula
scaffold_114	340894	341126	341010	g11915	2629	NA	planula
scaffold_114	349601	349833	349717	g11915	5846	NA	planula
scaffold_114	538528	538760	538644	g11933	479	NA	planula
scaffold_114	538908	539140	539024	g11933	859	NA	planula
scaffold_114	539332	539564	539448	g11933	1283	NA	gastrula and planula
scaffold_114	548814	549046	548930	aug11_g14028	10678	NA	planula
scaffold_114	554889	555121	555005	aug11_g14028	4603	NA	planula
scaffold_114	556102	556334	556218	aug11_g14028	3390	NA	gastrula and planula
scaffold_114	558878	559110	558994	aug11_g14028	614	NA	gastrula and planula
scaffold_114	559156	559388	559272	aug11_g14028	336	NA	planula
scaffold_114	593154	593386	593270	g11935	1952	serum paraoxonase arylesterase 2	planula
scaffold_115	61120	61352	61236	g11945	6063	NA	planula
scaffold_115	169818	170056	169937	g11953	929	piwi-like protein 1-like	gastrula
scaffold_115	170101	170333	170217	g11953	652	piwi-like protein 1-like	gastrula and planula
scaffold_115	448636	448784	448710	g11972	5548	sh3-domain kinase binding protein 1	gastrula
scaffold_116	20173	20405	20289	g11987	11577	mitotic spindle assembly checkpoint protein mad2b	planula
scaffold_116	22132	22364	22248	g11987	13536	mitotic spindle assembly checkpoint protein mad2b	planula
scaffold_116	134014	134162	134088	g11991	4023	NA	gastrula
scaffold_116	232317	232465	232391	g11997	13144	NA	gastrula
scaffold_116	278955	279187	279071	g12000	3556	wingless-related mmtv integration site 5a	planula
scaffold_116	287543	287775	287659	aug11_g14108	424	f-box lrr-repeat protein 14-like	planula
scaffold_116	288222	288454	288338	aug11_g14108	1103	f-box lrr-repeat protein 14-like	planula
scaffold_116	291538	291770	291654	aug11_g14108	4419	f-box lrr-repeat protein 14-like	planula
scaffold_116	292100	292332	292216	aug11_g14108	4981	f-box lrr-repeat protein 14-like	planula
scaffold_116	322374	322606	322490	g12001	729	protein wnt-7a-like	planula
scaffold_116	400228	400460	400344	g12008	1195	NA	planula
scaffold_116	473001	473233	473117	g12015	8879	NA	planula
scaffold_116	485514	485746	485630	g12016	732	NA	planula
scaffold_116	496428	496660	496544	g12017	1902	diencephalon mesencephalon homeobox 1	planula
scaffold_116	506096	506328	506212	g12018	2754	paired box protein pax-6-like	planula
scaffold_116	512957	513189	513073	g12020	3223	diencephalon mesencephalon homeobox protein 1-b-like isoform 1	gastrula and planula
scaffold_116	513143	513375	513259	g12020	3037	diencephalon mesencephalon homeobox protein 1-b-like isoform 1	gastrula and planula
scaffold_116	514366	514598	514482	g12020	1814	diencephalon mesencephalon homeobox protein 1-b-like isoform 1	planula
scaffold_116	521046	521380	521213	g12020	4634	diencephalon mesencephalon homeobox protein 1-b-like isoform 1	planula
scaffold_116	528359	528693	528526	g12021	2089	diencephalon mesencephalon homeobox 1	planula
scaffold_116	528761	528993	528877	g12021	1789	diencephalon mesencephalon homeobox 1	gastrula and planula
scaffold_116	541896	542128	542012	g12022	7083	NA	gastrula and planula
scaffold_116	542103	542335	542219	g12022	7290	NA	planula
scaffold_116	543260	543492	543376	g12022	8447	NA	planula
scaffold_117	6395	6627	6511	g12032	468	NA	planula
scaffold_117	26331	26563	26447	g12035	1493	frizzled homolog 10	planula
scaffold_117	26772	27004	26888	g12035	1052	frizzled homolog 10	planula
scaffold_117	27331	27563	27447	g12035	493	frizzled homolog 10	planula
scaffold_117	32367	32599	32483	g12035	4311	frizzled homolog 10	planula
scaffold_117	34558	34790	34674	g12035	6502	frizzled homolog 10	gastrula and planula
scaffold_117	216796	217028	216912	g12053	514	tyrosyl-dna phosphodiesterase 2	planula
scaffold_117	387962	388194	388078	g12060	4022	NA	planula
scaffold_117	388256	388488	388372	g12060	3728	NA	planula
scaffold_117	604564	604898	604731	g12076	5605	NA	gastrula and planula
scaffold_118	64758	64990	64874	g12086	383	transducer of 2	gastrula and planula
scaffold_118	124326	124558	124442	g12093	11057	NA	gastrula and planula
scaffold_118	145839	145987	145913	aug11_g14213	4709	NA	gastrula
scaffold_118	169987	170219	170103	g12095	424	NA	planula
scaffold_118	197591	197823	197707	g12096	999	NA	planula
scaffold_118	235793	236025	235909	g12099	13718	NA	planula
scaffold_118	337448	337680	337564	aug11_g14224	8801	solute carrier family member 36	planula
scaffold_118	337711	337943	337827	aug11_g14224	8538	solute carrier family member 36	planula
scaffold_118	337944	338176	338060	aug11_g14224	8305	solute carrier family member 36	planula
scaffold_118	338348	338580	338464	aug11_g14224	7901	solute carrier family member 36	planula
scaffold_118	338976	339208	339092	aug11_g14224	7273	solute carrier family member 36	planula
scaffold_118	340401	340633	340517	aug11_g14224	5848	solute carrier family member 36	planula
scaffold_118	340663	340895	340779	aug11_g14224	5586	solute carrier family member 36	planula
scaffold_118	353695	353927	353811	aug11_g14225	1098	solute carrier family member 36	gastrula and planula
scaffold_118	355273	355505	355389	aug11_g14225	2676	solute carrier family member 36	planula
scaffold_118	451913	452145	452029	g12109	2073	brain-specific angiogenesis inhibitor 1-associated protein 2-like	planula
scaffold_118	452224	452456	452340	g12109	1762	brain-specific angiogenesis inhibitor 1-associated protein 2-like	gastrula and planula
scaffold_118	459082	459416	459249	g12109	4864	brain-specific angiogenesis inhibitor 1-associated protein 2-like	planula
scaffold_118	517987	518219	518103	g12113	1446	cytoplasmic actin	gastrula and planula
scaffold_118	557547	557779	557663	g12120	586	NA	gastrula and planula
scaffold_119	155475	155707	155591	g12145	798	membrane metallo-endopeptidase-like 1-like	planula
scaffold_119	339902	340134	340018	aug11_g14308	2138	NA	gastrula and planula
scaffold_119	373346	373584	373465	aug11_g14314	6741	NA	gastrula
scaffold_119	414689	414921	414805	g12175	4276	NA	planula
scaffold_119	438371	438519	438445	g12176	14018	agrin precursor	gastrula
scaffold_119	523967	524301	524134	g12184	695	meiosis-specific transcription factor	planula
scaffold_119	601274	601506	601390	g12191	2580	pacrg-like isoform 1	gastrula and planula
scaffold_119	602159	602391	602275	g12191	3465	pacrg-like isoform 1	gastrula and planula
scaffold_119	639256	639488	639372	aug11_g14340	697	NA	gastrula and planula
scaffold_12	1953	2185	2069	g2390	8940	hematopoietically-expressed homeobox protein hhex	planula
scaffold_12	2159	2391	2275	g2390	8734	hematopoietically-expressed homeobox protein hhex	planula
scaffold_12	2805	3037	2921	g2390	8088	hematopoietically-expressed homeobox protein hhex	planula
scaffold_12	3375	3607	3491	g2390	7518	hematopoietically-expressed homeobox protein hhex	planula
scaffold_12	3952	4184	4068	g2390	6941	hematopoietically-expressed homeobox protein hhex	planula
scaffold_12	4241	4473	4357	g2390	6652	hematopoietically-expressed homeobox protein hhex	gastrula and planula
scaffold_12	5038	5270	5154	g2390	5855	hematopoietically-expressed homeobox protein hhex	planula
scaffold_12	7648	7982	7815	g2390	3143	hematopoietically-expressed homeobox protein hhex	gastrula and planula
scaffold_12	8425	8657	8541	g2390	2468	hematopoietically-expressed homeobox protein hhex	gastrula and planula
scaffold_12	8816	9048	8932	g2390	2077	hematopoietically-expressed homeobox protein hhex	planula
scaffold_12	11531	11763	11647	g2390	406	hematopoietically-expressed homeobox protein hhex	gastrula and planula
scaffold_12	12003	12235	12119	g2390	878	hematopoietically-expressed homeobox protein hhex	gastrula and planula
scaffold_12	13522	13754	13638	g2390	2397	hematopoietically-expressed homeobox protein hhex	planula
scaffold_12	126126	126358	126242	g2402	1310	potassium voltage-gated channel subfamily d member 2-like	planula
scaffold_12	126300	126532	126416	g2402	1484	potassium voltage-gated channel subfamily d member 2-like	planula
scaffold_12	139556	139788	139672	g2403	1751	potassium voltage-gated channel protein shal-like	planula
scaffold_12	139755	139987	139871	g2403	1950	potassium voltage-gated channel protein shal-like	planula
scaffold_12	355941	356173	356057	g2427	575	cd63 antigen	planula
scaffold_12	370886	371118	371002	aug11_g2744	546	NA	gastrula and planula
scaffold_12	374430	374764	374597	aug11_g2744	4090	NA	planula
scaffold_12	377637	377875	377756	g2430	1237	NA	gastrula
scaffold_12	381960	382192	382076	g2431	1050	NA	planula
scaffold_12	385130	385362	385246	g2431	1888	NA	gastrula and planula
scaffold_12	385511	385743	385627	aug11_g2747	1533	NA	planula
scaffold_12	386257	386405	386331	aug11_g2747	871	NA	gastrula
scaffold_12	499536	499768	499652	g2443	7855	NA	planula
scaffold_12	500647	500879	500763	g2443	6744	NA	gastrula and planula
scaffold_12	506904	507238	507071	g2443	385	NA	planula
scaffold_12	533660	533898	533779	aug11_g2769	4648	transcription factor sox-21	gastrula
scaffold_12	535959	536191	536075	aug11_g2769	2355	transcription factor sox-21	planula
scaffold_12	536817	537049	536933	aug11_g2769	1497	transcription factor sox-21	gastrula and planula
scaffold_12	540108	540340	540224	aug11_g2769	1562	transcription factor sox-21	gastrula and planula
scaffold_12	540375	540607	540491	aug11_g2769	1829	transcription factor sox-21	gastrula and planula
scaffold_12	551240	551472	551356	g2446	8348	alanopine dehydrogenase	planula
scaffold_12	602077	602315	602196	g2453	1027	protein glass-like	gastrula
scaffold_12	630585	630817	630701	g2456	523	guanine nucleotide binding protein (g protein) alpha activating activity polypeptide o	planula
scaffold_12	631803	632035	631919	g2456	463	guanine nucleotide binding protein (g protein) alpha activating activity polypeptide o	gastrula and planula
scaffold_12	632015	632247	632131	g2456	675	guanine nucleotide binding protein (g protein) alpha activating activity polypeptide o	planula
scaffold_12	634096	634328	634212	g2457	725	member ras oncogene family	planula
scaffold_12	668822	669054	668938	g2461	986	NA	planula
scaffold_12	720285	720523	720404	g2468	665	NA	gastrula
scaffold_12	856668	856900	856784	g2472	10119	NA	planula
scaffold_12	858041	858273	858157	g2472	11492	NA	planula
scaffold_12	862189	862421	862305	g2473	9787	zinc finger protein 233	planula
scaffold_12	863086	863420	863253	g2473	8788	zinc finger protein 233	planula
scaffold_12	884883	885115	884999	g2475	3022	NA	gastrula and planula
scaffold_12	960583	960917	960750	g2482	2190	fez family zinc finger protein 2	planula
scaffold_12	1001486	1001718	1001602	g2485	4689	NA	gastrula and planula
scaffold_12	1026825	1027057	1026941	g2487	1478	mannose-binding lectin associated serine protease-3	gastrula and planula
scaffold_12	1027579	1027811	1027695	g2487	2232	mannose-binding lectin associated serine protease-3	gastrula and planula
scaffold_12	1027877	1028109	1027993	g2487	2530	mannose-binding lectin associated serine protease-3	planula
scaffold_12	1028271	1028419	1028345	g2487	2924	mannose-binding lectin associated serine protease-3	gastrula
scaffold_12	1029644	1029792	1029718	g2487	4297	mannose-binding lectin associated serine protease-3	gastrula
scaffold_12	1032600	1032934	1032767	g2488	2793	NA	gastrula and planula
scaffold_12	1271411	1271643	1271527	g2518	1177	NA	gastrula and planula
scaffold_12	1272205	1272437	1272321	g2518	383	NA	planula
scaffold_12	1274070	1274302	1274186	g2518	1250	NA	planula
scaffold_12	1385042	1385274	1385158	aug11_g2866	539	NA	gastrula and planula
scaffold_12	1448740	1448978	1448859	g2540	502	haloacid dehalogenase-like hydrolase family protein	gastrula
scaffold_12	1463251	1463483	1463367	g2542	790	NA	planula
scaffold_12	1512970	1513202	1513086	g2548	3119	NA	planula
scaffold_12	1555039	1555277	1555158	g2551	6233	suppressor of 3-like 1 ( cerevisiae)	gastrula
scaffold_12	1576367	1576599	1576483	g2552	8504	NA	planula
scaffold_12	1586773	1587005	1586889	g2552	1670	NA	planula
scaffold_12	1637710	1637942	1637826	g2561	1702	insulin receptor	planula
scaffold_12	1715315	1715547	1715431	aug11_g2903	651	metallo-beta-lactamase domain-containing protein 2	planula
scaffold_12	1735729	1736063	1735896	g2571	1701	NA	planula
scaffold_12	1791658	1791896	1791777	g2578	8282	lim and senescent cell antigen-like domains 1	gastrula
scaffold_120	17484	17716	17600	g12198	1139	NA	planula
scaffold_120	40872	41206	41039	g12199	687	heterogeneous nuclear ribonucleoprotein a b	gastrula and planula
scaffold_120	41615	41847	41731	g12199	1430	heterogeneous nuclear ribonucleoprotein a b	gastrula and planula
scaffold_120	42797	43029	42913	g12199	2612	heterogeneous nuclear ribonucleoprotein a b	planula
scaffold_120	111185	111333	111259	g12208	733	NA	gastrula
scaffold_120	112376	112614	112495	g12208	310	NA	gastrula
scaffold_120	114739	114977	114858	g12208	2673	NA	gastrula
scaffold_120	211249	211481	211365	g12214	1485	NA	planula
scaffold_120	227874	228106	227990	g12217	1168	phosphonoacetaldehyde hydrolase	planula
scaffold_120	249261	249493	249377	g12220	1417	NA	planula
scaffold_120	252229	252461	252345	g12220	4385	NA	planula
scaffold_120	264863	265095	264979	g12221	1779	protein cgmp- type i	gastrula and planula
scaffold_120	265978	266210	266094	g12221	664	protein cgmp- type i	gastrula and planula
scaffold_120	393343	393575	393459	g12226	21292	NA	planula
scaffold_120	393593	393825	393709	g12226	21542	NA	planula
scaffold_120	393843	394075	393959	g12226	21792	NA	planula
scaffold_120	436031	436263	436147	g12229	1848	NA	planula
scaffold_120	436356	436588	436472	g12229	1523	NA	planula
scaffold_120	642502	642734	642618	g12243	534	NA	planula
scaffold_120	645066	645298	645182	g12243	3098	NA	gastrula and planula
scaffold_121	124992	125230	125111	g12258	1066	NA	gastrula
scaffold_121	200659	200897	200778	g12262	2566	vang-like protein 1	gastrula
scaffold_121	569350	569498	569424	g12288	1820	1-aminocyclopropane-1-carboxylate deaminase-like	gastrula
scaffold_121	589565	589797	589681	g12290	5583	NA	planula
scaffold_121	629740	629972	629856	g12293	3108	NA	planula
scaffold_121	632356	632588	632472	g12293	492	NA	planula
scaffold_121	634953	635185	635069	g12294	1176	muscleblind-like 3	gastrula and planula
scaffold_121	635547	635779	635663	g12294	582	muscleblind-like 3	gastrula and planula
scaffold_121	635705	635937	635821	g12294	424	muscleblind-like 3	gastrula and planula
scaffold_122	212866	213098	212982	g12313	2722	NA	planula
scaffold_122	417114	417448	417281	g12330	9397	photoreceptor-specific nuclear receptor	gastrula and planula
scaffold_122	459822	459970	459896	g12332	5076	NA	gastrula
scaffold_122	539155	539393	539274	aug11_g14510	798	proto-oncogene serine threonine-protein kinase mos-like	gastrula
scaffold_122	541983	542131	542057	aug11_g14510	1792	proto-oncogene serine threonine-protein kinase mos-like	gastrula
scaffold_122	542450	542682	542566	aug11_g14510	2259	proto-oncogene serine threonine-protein kinase mos-like	gastrula and planula
scaffold_122	624929	625167	625048	g12343	3058	forkhead box subgroup partial	gastrula
scaffold_122	628605	628837	628721	g12343	380	forkhead box subgroup partial	gastrula and planula
scaffold_122	632755	632987	632871	g12343	4530	forkhead box subgroup partial	planula
scaffold_122	634294	634526	634410	g12343	6069	forkhead box subgroup partial	planula
scaffold_122	634891	635039	634965	g12343	6666	forkhead box subgroup partial	gastrula
scaffold_123	25139	25473	25306	g12346	5193	substance-k receptor	planula
scaffold_123	65710	65942	65826	g12349	6044	protein associated with topoisomerase ii homolog 1	planula
scaffold_123	65982	66214	66098	g12349	5772	protein associated with topoisomerase ii homolog 1	planula
scaffold_123	103786	104018	103902	g12350	6770	cytosolic fe-s cluster assembly factor narfl	planula
scaffold_123	128709	128941	128825	aug11_g14523	1014	bone morphogenetic protein 1b	planula
scaffold_123	129276	129508	129392	aug11_g14523	1581	bone morphogenetic protein 1b	gastrula and planula
scaffold_123	357546	357778	357662	g12363	470	rab3a interacting protein	planula
scaffold_123	428271	428503	428387	g12367	488	cyclic amp-responsive element-binding protein 3-like protein 1	planula
scaffold_123	429268	429500	429384	g12367	1485	cyclic amp-responsive element-binding protein 3-like protein 1	planula
scaffold_123	429494	429726	429610	g12367	1711	cyclic amp-responsive element-binding protein 3-like protein 1	planula
scaffold_123	623409	623641	623525	aug11_g14566	5431	NA	gastrula and planula
scaffold_124	2146	2378	2262	g12385	907	NA	planula
scaffold_124	142200	142432	142316	g12398	3873	forkhead domain-containing	planula
scaffold_124	142493	142725	142609	g12398	3580	forkhead domain-containing	gastrula and planula
scaffold_124	142966	143198	143082	g12398	3107	forkhead domain-containing	gastrula and planula
scaffold_124	143856	144190	144023	g12398	2115	forkhead domain-containing	gastrula and planula
scaffold_124	294972	295204	295088	g12411	440	NA	planula
scaffold_124	296541	296773	296657	g12411	897	NA	planula
scaffold_124	346986	347218	347102	g12416	1536	thioredoxin reductase 3	planula
scaffold_124	350092	350240	350166	g12416	1338	thioredoxin reductase 3	gastrula
scaffold_124	371476	371624	371550	g12417	539	camp-dependent protein kinase type ii-alpha regulatory subunit	gastrula
scaffold_124	522997	523229	523113	g12429	675	NA	planula
scaffold_124	526432	526670	526551	g12429	2528	NA	gastrula
scaffold_124	527378	527610	527494	g12429	3474	NA	gastrula and planula
scaffold_124	528588	528820	528704	g12429	4684	NA	gastrula and planula
scaffold_124	529103	529437	529270	g12429	5199	NA	planula
scaffold_124	529580	529728	529654	g12429	5676	NA	gastrula
scaffold_124	529724	529872	529798	g12429	5820	NA	gastrula
scaffold_124	532354	532586	532470	g12429	8450	NA	planula
scaffold_124	618416	618648	618532	g12436	7245	dual specificity protein phosphatase cdc14a isoform 1	planula
scaffold_125	138009	138241	138125	g12446	763	bcl-2-related ovarian killer protein	planula
scaffold_125	142254	142588	142421	g12446	5008	bcl-2-related ovarian killer protein	planula
scaffold_125	403998	404332	404165	g12461	638	oncoprotein-induced transcript 3 protein	planula
scaffold_125	405844	406082	405963	g12461	874	oncoprotein-induced transcript 3 protein	gastrula
scaffold_125	423689	423921	423805	g12461	18719	oncoprotein-induced transcript 3 protein	gastrula and planula
scaffold_125	594482	594720	594601	g12469	15227	ral guanine nucleotide dissociation stimulator	gastrula
scaffold_126	92206	92438	92322	g12481	6927	NA	planula
scaffold_126	92480	92712	92596	g12481	6653	NA	planula
scaffold_126	215634	215866	215750	g12496	2083	NA	gastrula and planula
scaffold_126	216062	216300	216181	g12496	1649	NA	gastrula
scaffold_126	309720	309868	309794	g12509	871	NA	gastrula
scaffold_126	310218	310450	310334	g12509	1369	NA	gastrula and planula
scaffold_126	314653	314891	314772	g12510	1178	asparaginase like isoform cra_a	gastrula
scaffold_126	315028	315266	315147	g12510	803	asparaginase like isoform cra_a	gastrula
scaffold_126	315285	315433	315359	g12510	636	asparaginase like isoform cra_a	gastrula
scaffold_126	317347	317681	317514	g12510	1278	asparaginase like isoform cra_a	planula
scaffold_126	343258	343592	343425	g12513	1382	NA	gastrula and planula
scaffold_126	388181	388413	388297	g12518	801	NA	gastrula and planula
scaffold_126	490550	490782	490666	g12531	384	NA	planula
scaffold_126	609925	610157	610041	g12543	918	NA	planula
scaffold_126	610139	610371	610255	g12543	1132	NA	planula
scaffold_127	15083	15315	15199	g12545	1848	NA	planula
scaffold_127	26553	26785	26669	g12546	1088	NA	planula
scaffold_127	28551	28783	28667	g12547	1373	heme-binding protein 2-like	planula
scaffold_127	85896	86134	86015	g12550	6371	NA	gastrula
scaffold_127	135327	135559	135443	g12555	2651	NA	planula
scaffold_127	406228	406460	406344	aug11_g14829	450	NA	planula
scaffold_127	432481	432713	432597	aug11_g14830	753	NA	planula
scaffold_127	513880	514112	513996	g12597	560	NA	planula
scaffold_128	122628	122860	122744	g12613	2012	isoform a	planula
scaffold_128	123278	123510	123394	g12613	2662	isoform a	gastrula and planula
scaffold_128	123496	123728	123612	g12613	2880	isoform a	gastrula and planula
scaffold_128	325895	326127	326011	g12627	9234	dual specificity protein phosphatase cdc14a isoform 1	planula
scaffold_128	331496	331728	331612	g12627	3633	dual specificity protein phosphatase cdc14a isoform 1	planula
scaffold_128	332131	332363	332247	g12627	2998	dual specificity protein phosphatase cdc14a isoform 1	gastrula and planula
scaffold_128	332369	332601	332485	g12627	2760	dual specificity protein phosphatase cdc14a isoform 1	gastrula and planula
scaffold_128	335842	336080	335961	g12627	481	dual specificity protein phosphatase cdc14a isoform 1	gastrula
scaffold_128	336093	336325	336209	g12627	732	dual specificity protein phosphatase cdc14a isoform 1	gastrula and planula
scaffold_128	336694	336926	336810	g12627	1333	dual specificity protein phosphatase cdc14a isoform 1	gastrula and planula
scaffold_128	337625	337857	337741	g12627	2264	dual specificity protein phosphatase cdc14a isoform 1	planula
scaffold_128	531369	531601	531485	g12641	358	NA	planula
scaffold_128	542847	543085	542966	g12642	2025	golgi integral membrane protein	gastrula
scaffold_128	543270	543508	543389	g12642	1602	golgi integral membrane protein	gastrula
scaffold_128	548683	548915	548799	g12643	496	loc570443 protein	planula
scaffold_129	12515	12663	12589	g12652	519	septin 6	gastrula
scaffold_129	30146	30378	30262	g12656	577	NA	gastrula and planula
scaffold_129	55229	55461	55345	g12662	735	NA	planula
scaffold_129	55582	55814	55698	g12662	382	NA	planula
scaffold_129	95648	95796	95722	g12667	3542	NA	gastrula
scaffold_129	96994	97226	97110	g12667	4888	NA	planula
scaffold_129	100138	100370	100254	g12667	8032	NA	planula
scaffold_129	123710	123948	123829	g12668	4897	NA	gastrula
scaffold_129	124693	124925	124809	g12668	3920	NA	gastrula and planula
scaffold_129	166128	166360	166244	g12670	383	tolloid-like protein 1 precursor	gastrula and planula
scaffold_129	167052	167284	167168	g12670	1307	tolloid-like protein 1 precursor	planula
scaffold_129	168571	168905	168738	g12670	2826	tolloid-like protein 1 precursor	planula
scaffold_129	170731	170963	170847	g12671	4050	NA	planula
scaffold_129	171880	172112	171996	g12671	2901	NA	planula
scaffold_129	172187	172419	172303	g12671	2594	NA	planula
scaffold_129	175765	175997	175881	g12671	752	NA	gastrula and planula
scaffold_129	362432	362664	362548	g12682	1498	NA	planula
scaffold_129	398460	398692	398576	aug11_g14951	1221	---NA---	planula
scaffold_129	398817	399049	398933	aug11_g14951	864	---NA---	planula
scaffold_129	399145	399377	399261	aug11_g14951	536	---NA---	planula
scaffold_129	400528	400760	400644	aug11_g14951	615	---NA---	planula
scaffold_129	401016	401248	401132	aug11_g14951	1103	---NA---	planula
scaffold_129	404779	404927	404853	g12686	1257	NA	gastrula
scaffold_129	413828	414060	413944	g12688	5412	NA	gastrula and planula
scaffold_129	474610	474842	474726	g12692	3719	NA	gastrula and planula
scaffold_129	475697	475929	475813	g12692	4806	NA	planula
scaffold_129	476161	476393	476277	g12692	5270	NA	planula
scaffold_129	476446	476678	476562	g12692	5555	NA	gastrula and planula
scaffold_129	478891	479123	479007	g12692	8000	NA	planula
scaffold_129	562662	562894	562778	g12703	302	NA	planula
scaffold_13	8857	9089	8973	g2581	426	2-amino-4-hydroxy-6-hydroxymethyldihydropteridine pyrophosphokinase	planula
scaffold_13	114982	115220	115101	g2594	1907	4-hydroxyphenylpyruvate dioxygenase	gastrula
scaffold_13	122023	122255	122139	g2595	520	hepatocyte nuclear factor 1-alpha	gastrula and planula
scaffold_13	157565	157797	157681	aug11_g2945	1510	NA	gastrula and planula
scaffold_13	318752	318984	318868	g2613	829	deoxyribonuclease gamma precursor	planula
scaffold_13	321903	322135	322019	g2613	2090	deoxyribonuclease gamma precursor	planula
scaffold_13	329407	329555	329481	g2614	1497	NA	gastrula
scaffold_13	341624	341856	341740	g2616	799	septin 5a	gastrula and planula
scaffold_13	454478	454710	454594	g2624	2924	60s acidic ribosomal protein p2-like	planula
scaffold_13	466746	467080	466913	g2626	5324	NA	planula
scaffold_13	470691	470923	470807	g2626	1481	NA	planula
scaffold_13	473361	473593	473477	g2626	957	NA	planula
scaffold_13	568190	568422	568306	g2632	1013	NA	planula
scaffold_13	568781	569013	568897	g2632	422	NA	planula
scaffold_13	698086	698318	698202	g2644	732	yippee-like 2	gastrula and planula
scaffold_13	1028587	1028819	1028703	g2681	510	dna primase large subunit	planula
scaffold_13	1061406	1061638	1061522	g2683	1040	NA	planula
scaffold_13	1121912	1122144	1122028	g2692	574	NA	gastrula and planula
scaffold_13	1122178	1122410	1122294	g2692	840	NA	planula
scaffold_13	1148023	1148255	1148139	g2697	7994	breakpoint cluster region partial	planula
scaffold_13	1169030	1169262	1169146	g2698	3232	uncharacterized protein ymr196w-like	planula
scaffold_13	1218341	1218573	1218457	aug11_g3053	494	NA	planula
scaffold_13	1355917	1356065	1355991	g2716	4566	histocompatibility 13	gastrula
scaffold_13	1385584	1385816	1385700	g2720	369	NA	gastrula and planula
scaffold_13	1591409	1591641	1591525	g2749	1296	kinase suppressor of ras 2-like	planula
scaffold_13	1634641	1634879	1634760	g2755	314	NA	gastrula
scaffold_13	1750889	1751121	1751005	aug11_g3136	723	NA	gastrula and planula
scaffold_13	1755855	1756087	1755971	g2770	961	NA	planula
scaffold_13	1794548	1794780	1794664	g2776	550	low quality protein: sacsin-like	planula
scaffold_130	17168	17400	17284	g12712	3652	NA	planula
scaffold_130	67362	67594	67478	g12716	2096	NA	planula
scaffold_130	76486	76718	76602	g12717	8078	wingless-type mmtv integration site member 4a	planula
scaffold_130	83510	83742	83626	g12717	1054	wingless-type mmtv integration site member 4a	planula
scaffold_130	85813	86045	85929	g12717	1017	wingless-type mmtv integration site member 4a	planula
scaffold_130	86991	87223	87107	g12717	2195	wingless-type mmtv integration site member 4a	planula
scaffold_130	117674	117912	117793	g12719	10313	NA	gastrula
scaffold_130	126040	126272	126156	g12719	1953	NA	gastrula and planula
scaffold_130	126288	126520	126404	g12719	1705	NA	gastrula and planula
scaffold_130	129302	129534	129418	g12719	1077	NA	planula
scaffold_130	129580	129812	129696	g12719	1355	NA	planula
scaffold_130	264359	264591	264475	g12725	711	dixin isoform 1	planula
scaffold_130	277863	278095	277979	g12728	588	solute carrier family 1 (glial high affinity glutamate transporter) member 3	gastrula and planula
scaffold_130	279994	280142	280068	g12728	1311	solute carrier family 1 (glial high affinity glutamate transporter) member 3	gastrula
scaffold_130	296148	296380	296264	g12729	4595	phosphoglycolate phosphatase	gastrula and planula
scaffold_130	296296	296528	296412	g12729	4743	phosphoglycolate phosphatase	gastrula and planula
scaffold_130	461165	461397	461281	g12748	683	NA	planula
scaffold_130	461558	461706	461632	g12748	1076	NA	gastrula
scaffold_130	503472	503704	503588	g12753	401	NA	planula
scaffold_130	520783	521015	520899	g12756	5681	tumor necrosis factor member 10	gastrula and planula
scaffold_130	521318	521550	521434	g12756	5146	tumor necrosis factor member 10	planula
scaffold_130	521664	521896	521780	g12756	4800	tumor necrosis factor member 10	gastrula and planula
scaffold_130	522661	522893	522777	g12756	3803	tumor necrosis factor member 10	planula
scaffold_130	524715	524947	524831	g12756	1749	tumor necrosis factor member 10	planula
scaffold_130	525065	525297	525181	g12756	1399	tumor necrosis factor member 10	gastrula and planula
scaffold_130	525564	525796	525680	g12756	900	tumor necrosis factor member 10	planula
scaffold_130	526145	526383	526264	g12756	313	tumor necrosis factor member 10	gastrula
scaffold_130	527570	527808	527689	g12756	874	tumor necrosis factor member 10	gastrula
scaffold_130	529148	529386	529267	g12756	2452	tumor necrosis factor member 10	gastrula
scaffold_130	559183	559415	559299	g12757	12168	NA	planula
scaffold_130	574702	574934	574818	g12758	437	NA	gastrula and planula
scaffold_131	325038	325276	325157	g12784	4175	NA	gastrula
scaffold_131	381033	381265	381149	g12791	1177	dystroglycan precursor	planula
scaffold_131	388573	388805	388689	g12791	6131	dystroglycan precursor	planula
scaffold_131	408488	408720	408604	g12793	447	NA	planula
scaffold_131	408838	409070	408954	g12793	797	NA	gastrula and planula
scaffold_132	47116	47264	47190	aug11_g15110	7620	NA	gastrula
scaffold_132	61094	61326	61210	g12808	909	NA	planula
scaffold_132	214438	214670	214554	g12824	697	NA	gastrula and planula
scaffold_132	252517	252749	252633	aug11_g15132	6925	leucine-rich repeat-containing protein loc400891-like	gastrula and planula
scaffold_132	285557	285705	285631	aug11_g15141	1545	---NA---	gastrula
scaffold_132	450291	450439	450365	g12855	378	serine threonine-protein kinase plk1	gastrula
scaffold_132	524388	524626	524507	g12864	5430	NA	gastrula
scaffold_133	24228	24460	24344	g12876	836	NA	gastrula and planula
scaffold_133	24512	24744	24628	g12876	552	NA	gastrula and planula
scaffold_133	24742	24974	24858	g12876	322	NA	gastrula and planula
scaffold_133	34544	34692	34618	g12878	1848	NA	gastrula
scaffold_133	54347	54585	54466	g12879	842	coiled-coil domain-containing protein 62	gastrula
scaffold_133	58010	58242	58126	g12880	484	tnf receptor-associated factor 4	gastrula and planula
scaffold_133	60956	61188	61072	g12880	2230	tnf receptor-associated factor 4	planula
scaffold_133	63901	64133	64017	g12880	5175	tnf receptor-associated factor 4	planula
scaffold_133	64250	64482	64366	g12880	5524	tnf receptor-associated factor 4	planula
scaffold_133	74950	75182	75066	g12881	913	NA	planula
scaffold_133	409719	409951	409835	aug11_g15240	3521	NA	planula
scaffold_133	412252	412484	412368	aug11_g15240	988	NA	planula
scaffold_133	412653	412885	412769	aug11_g15240	587	NA	planula
scaffold_133	414585	414919	414752	aug11_g15240	1113	NA	gastrula and planula
scaffold_133	601840	602174	602007	g12930	837	NA	planula
scaffold_134	10173	10411	10292	g12933	545	NA	gastrula
scaffold_134	12353	12585	12469	g12933	1397	NA	gastrula and planula
scaffold_134	13035	13267	13151	g12933	2079	NA	gastrula and planula
scaffold_134	14420	14658	14539	g12933	3464	NA	gastrula
scaffold_134	69845	70077	69961	g12939	2929	NA	planula
scaffold_134	211542	211876	211709	g12947	4017	NA	gastrula and planula
scaffold_134	247333	247481	247407	g12948	6933	NA	gastrula
scaffold_134	331297	331445	331371	g12954	3602	NA	gastrula
scaffold_134	382693	382925	382809	g12955	8719	phospholipase d1	gastrula and planula
scaffold_134	382925	383259	383092	g12955	8951	phospholipase d1	gastrula and planula
scaffold_134	383575	383807	383691	g12957	8953	NA	gastrula and planula
scaffold_134	389394	389626	389510	g12957	3134	NA	planula
scaffold_134	393846	394084	393965	g12957	1086	NA	gastrula
scaffold_134	449761	449999	449880	g12962	11991	NA	gastrula
scaffold_134	476234	476466	476350	g12964	10354	NA	planula
scaffold_134	477043	477275	477159	g12964	11163	NA	planula
scaffold_134	496650	496882	496766	g12965	3087	synaptotagmin isoform a	planula
scaffold_134	498661	498809	498735	g12965	1160	synaptotagmin isoform a	gastrula
scaffold_134	499216	499364	499290	g12965	605	synaptotagmin isoform a	gastrula
scaffold_135	59497	59729	59613	g12977	10811	cytosolic carboxypeptidase-like protein 5	gastrula and planula
scaffold_135	93984	94216	94100	g12981	1280	voltage-gated hydrogen channel 1	planula
scaffold_135	216681	216913	216797	g12993	3355	NA	planula
scaffold_135	247857	248005	247931	g12996	341	protein phosphatase slingshot homolog 2	gastrula
scaffold_135	311684	311916	311800	g13001	968	gamma-glutamyltranspeptidase 1 precursor	planula
scaffold_135	312102	312436	312269	g13001	1386	gamma-glutamyltranspeptidase 1 precursor	planula
scaffold_135	373624	373856	373740	g13007	3980	cad protein	planula
scaffold_135	376574	376806	376690	g13007	1030	cad protein	planula
scaffold_135	459247	459479	459363	aug11_g15357	3213	---NA---	planula
scaffold_135	461559	461791	461675	aug11_g15357	5525	---NA---	gastrula and planula
scaffold_135	462168	462400	462284	aug11_g15357	6134	---NA---	planula
scaffold_135	500684	500916	500800	g13014	15250	short isoform l	gastrula and planula
scaffold_135	501264	501496	501380	g13014	14670	short isoform l	planula
scaffold_135	516564	516898	516731	g13014	398	short isoform l	planula
scaffold_135	518157	518389	518273	g13015	581	NA	planula
scaffold_1355	28604	28752	28678	g21999	13839	NA	gastrula
scaffold_136	3200	3432	3316	g13025	7093	coup transcription factor 1	planula
scaffold_136	4946	5178	5062	g13025	5347	coup transcription factor 1	planula
scaffold_136	5263	5495	5379	g13025	5030	coup transcription factor 1	planula
scaffold_136	9400	9632	9516	g13025	893	coup transcription factor 1	planula
scaffold_136	9813	10045	9929	g13025	480	coup transcription factor 1	gastrula and planula
scaffold_136	12063	12295	12179	g13025	1538	coup transcription factor 1	planula
scaffold_136	13573	13805	13689	g13025	3048	coup transcription factor 1	gastrula and planula
scaffold_136	15246	15478	15362	g13026	3998	NA	gastrula and planula
scaffold_136	34656	34888	34772	g13028	6577	NA	planula
scaffold_136	34881	35113	34997	g13028	6352	NA	planula
scaffold_136	122458	122690	122574	g13037	1765	x-prolyl aminopeptidase (aminopeptidase p) soluble	gastrula and planula
scaffold_136	253464	253696	253580	g13047	4640	met proto-oncogene precursor	planula
scaffold_136	264028	264260	264144	g13048	3495	NA	planula
scaffold_136	272703	272851	272777	g13048	4948	NA	gastrula
scaffold_136	281775	282007	281891	g13049	1751	NA	planula
scaffold_136	295472	295620	295546	g13052	2195	NA	gastrula
scaffold_136	386347	386579	386463	g13056	413	NA	gastrula and planula
scaffold_136	386491	386723	386607	g13057	303	centrosomal protein of 120 kda	gastrula and planula
scaffold_136	407634	407866	407750	g13058	400	NA	gastrula and planula
scaffold_137	68396	68730	68563	g13085	13440	alpha- -mannosylglycoprotein 6-beta-n-acetylglucosaminyltransferase a	planula
scaffold_137	99757	99989	99873	g13087	11526	NA	planula
scaffold_137	167047	167195	167121	aug11_g15449	782	isoform b	gastrula
scaffold_137	180131	180363	180247	g13091	3642	brachyury protein	planula
scaffold_137	181679	182013	181846	g13091	1992	brachyury protein	planula
scaffold_137	182479	182711	182595	g13091	1294	brachyury protein	gastrula and planula
scaffold_137	182837	183069	182953	g13091	936	brachyury protein	gastrula and planula
scaffold_137	188984	189216	189100	g13091	4979	brachyury protein	planula
scaffold_137	212294	212526	212410	g13095	12869	rh type b glycoprotein	planula
scaffold_137	239760	239992	239876	g13096	2083	low quality protein: histone-lysine n-methyltransferase mll3-like	planula
scaffold_137	275650	275984	275817	g13097	3471	NA	planula
scaffold_137	278162	278394	278278	g13097	1061	NA	gastrula and planula
scaffold_137	278984	279132	279058	g13097	323	NA	gastrula
scaffold_137	279983	280215	280099	g13097	528	NA	gastrula and planula
scaffold_137	326200	326348	326274	g13099	1066	NA	gastrula
scaffold_137	328162	328394	328278	g13099	748	NA	planula
scaffold_137	330494	330726	330610	g13100	899	protein tanc2-like	gastrula and planula
scaffold_137	331395	331627	331511	g13100	1800	protein tanc2-like	gastrula and planula
scaffold_137	332430	332662	332546	g13100	2835	protein tanc2-like	gastrula and planula
scaffold_137	332917	333149	333033	g13100	3322	protein tanc2-like	gastrula and planula
scaffold_137	430814	431046	430930	g13108	4129	homeobox protein engrailed-2b-like	planula
scaffold_137	472565	472797	472681	g13115	869	NA	gastrula and planula
scaffold_137	543718	544052	543885	g13119	5128	NA	planula
scaffold_137	570534	570766	570650	g13121	374	multiple inositol polyphosphate phosphatase 1-like	planula
scaffold_138	174056	174204	174130	g13138	581	cyclin-dependent kinase 6	gastrula
scaffold_138	188123	188355	188239	g13139	2135	NA	gastrula and planula
scaffold_138	213975	214207	214091	g13141	925	NA	planula
scaffold_138	258727	258959	258843	g13145	6137	NA	planula
scaffold_138	259294	259526	259410	g13145	6704	NA	planula
scaffold_138	261189	261523	261356	g13146	7027	ets variant 1	planula
scaffold_138	263253	263401	263327	g13146	5149	ets variant 1	gastrula
scaffold_138	276863	277197	277030	g13146	8313	ets variant 1	gastrula and planula
scaffold_138	291730	291962	291846	aug11_g15524	2581	sclerostin domain-containing protein 1-like	gastrula and planula
scaffold_138	292009	292241	292125	aug11_g15524	2302	sclerostin domain-containing protein 1-like	gastrula and planula
scaffold_138	292384	292616	292500	aug11_g15524	1927	sclerostin domain-containing protein 1-like	gastrula and planula
scaffold_138	409183	409415	409299	g13160	2964	gamma-aminobutyric acid receptor subunit beta-3	planula
scaffold_138	414504	414736	414620	g13160	2125	gamma-aminobutyric acid receptor subunit beta-3	planula
scaffold_138	434072	434304	434188	aug11_g15542	1694	g-protein coupled octopamine	planula
scaffold_138	435537	435769	435653	aug11_g15542	3159	g-protein coupled octopamine	planula
scaffold_138	469949	470181	470065	g13165	3868	triple functional domain protein	gastrula and planula
scaffold_138	550730	550962	550846	g13172	2877	NA	gastrula and planula
scaffold_138	551448	551680	551564	g13172	2159	NA	planula
scaffold_138	554385	554617	554501	g13172	546	NA	planula
scaffold_1383	15581	15813	15697	g22021	946	NA	gastrula and planula
scaffold_1383	15837	16069	15953	g22021	1202	NA	planula
scaffold_1383	16625	16857	16741	g22021	1990	NA	planula
scaffold_1383	16877	17109	16993	g22021	2242	NA	planula
scaffold_139	12622	12770	12696	g13177	4845	NA	gastrula
scaffold_139	93936	94084	94010	g13185	1002	leucine-rich repeat-containing protein	gastrula
scaffold_139	131323	131555	131439	g13188	391	NA	planula
scaffold_139	137617	137849	137733	g13188	5671	NA	gastrula and planula
scaffold_139	138486	138718	138602	g13188	6540	NA	planula
scaffold_139	158057	158289	158173	aug11_g15586	616	cytidine deaminase	planula
scaffold_139	206312	206544	206428	g13198	2361	coiled-coil domain-containing protein 50-like	gastrula and planula
scaffold_139	206681	206913	206797	g13198	1992	coiled-coil domain-containing protein 50-like	planula
scaffold_139	207579	207811	207695	g13198	1094	coiled-coil domain-containing protein 50-like	gastrula and planula
scaffold_139	264320	264654	264487	g13203	1100	NA	planula
scaffold_139	350944	351092	351018	aug11_g15607	462	retinal pigment epithelium-derived rhodopsin homolog	gastrula
scaffold_139	362720	362952	362836	g13211	672	NA	planula
scaffold_139	403619	403767	403693	g13217	2015	NA	gastrula
scaffold_139	558419	558651	558535	g13238	2661	multiple coagulation factor deficiency protein 2 isoform a precursor	gastrula and planula
scaffold_14	37377	37609	37493	aug11_g3151	2656	NA	planula
scaffold_14	194714	194862	194788	g2792	8124	histamine h2 receptor	gastrula
scaffold_14	212735	212967	212851	g2795	575	NA	planula
scaffold_14	244274	244506	244390	g2797	465	subtilisin-like kinase spc4	planula
scaffold_14	244916	245148	245032	g2797	1107	subtilisin-like kinase spc4	planula
scaffold_14	320478	320710	320594	g2803	11708	NA	planula
scaffold_14	358766	358998	358882	g2805	1314	NA	planula
scaffold_14	364511	364659	364585	g2805	4199	NA	gastrula
scaffold_14	424115	424353	424234	g2813	3743	hypothetical protein BRAFLDRAFT_168758 [Branchiostoma floridae]	gastrula
scaffold_14	462549	462781	462665	g2822	1111	transcriptional enhancer factor tef-3	planula
scaffold_14	465093	465427	465260	g2822	1201	transcriptional enhancer factor tef-3	planula
scaffold_14	465526	465764	465645	g2822	1634	transcriptional enhancer factor tef-3	gastrula
scaffold_14	486557	486789	486673	g2826	953	NA	planula
scaffold_14	488615	488847	488731	g2826	873	NA	planula
scaffold_14	505089	505321	505205	g2827	907	NA	gastrula and planula
scaffold_14	506203	506435	506319	g2827	2021	NA	planula
scaffold_14	559519	559667	559593	g2831	4988	NA	gastrula
scaffold_14	656907	657139	657023	g2837	941	glutathione s-transferase mu 3	planula
scaffold_14	677025	677257	677141	g2840	1379	short-chain dehydrogenase reductase sdr	planula
scaffold_14	677347	677579	677463	g2840	1057	short-chain dehydrogenase reductase sdr	planula
scaffold_14	687075	687307	687191	g2841	5950	NA	planula
scaffold_14	695303	695535	695419	g2841	2046	NA	gastrula and planula
scaffold_14	696023	696255	696139	g2841	2766	NA	planula
scaffold_14	748486	748820	748653	g2848	337	NA	planula
scaffold_14	756307	756539	756423	g2849	1010	protein isoform 2	planula
scaffold_14	762605	762837	762721	g2850	6980	protein isoform 2	planula
scaffold_14	797059	797291	797175	g2856	21246	NA	planula
scaffold_14	800250	800488	800369	g2856	18049	NA	gastrula
scaffold_14	800756	800988	800872	g2856	17549	NA	planula
scaffold_14	803750	803982	803866	g2856	14555	NA	planula
scaffold_14	813942	814174	814058	g2856	4363	NA	planula
scaffold_14	814448	814680	814564	g2856	3857	NA	planula
scaffold_14	815011	815243	815127	g2856	3294	NA	planula
scaffold_14	869257	869489	869373	g2862	3811	epithelial splicing regulatory protein 2-like	planula
scaffold_14	871257	871489	871373	g2862	5811	epithelial splicing regulatory protein 2-like	planula
scaffold_14	883492	883826	883659	aug11_g3235	8150	NA	gastrula and planula
scaffold_14	883959	884191	884075	aug11_g3235	7785	NA	planula
scaffold_14	885988	886136	886062	aug11_g3235	5840	NA	gastrula
scaffold_14	886189	886427	886308	aug11_g3235	5549	NA	gastrula
scaffold_14	962478	962626	962552	g2866	13860	NA	gastrula
scaffold_14	965539	965771	965655	g2866	10715	NA	planula
scaffold_14	1072412	1072644	1072528	g2871	688	jagged 1	planula
scaffold_14	1127603	1127751	1127677	g2878	6550	NA	gastrula
scaffold_14	1138011	1138345	1138178	aug11_g3253	804	transcription factor maf-like	planula
scaffold_14	1247583	1247917	1247750	g2888	556	NA	planula
scaffold_14	1261202	1261434	1261318	g2889	3014	cytochrome p450 4b1-like	planula
scaffold_14	1261942	1262174	1262058	g2889	3754	cytochrome p450 4b1-like	planula
scaffold_14	1280558	1280790	1280674	g2891	600	low quality protein: chromodomain-helicase-dna-binding protein 9-like	planula
scaffold_14	1283161	1283399	1283280	g2891	3203	low quality protein: chromodomain-helicase-dna-binding protein 9-like	gastrula
scaffold_14	1308993	1309231	1309112	g2892	20127	NA	gastrula
scaffold_14	1327556	1327704	1327630	g2892	1654	NA	gastrula
scaffold_14	1355346	1355584	1355465	g2895	8693	NA	gastrula
scaffold_14	1411386	1411618	1411502	g2901	565	sorting nexin 16	planula
scaffold_14	1448500	1448732	1448616	aug11_g3281	3223	NA	gastrula and planula
scaffold_14	1451342	1451574	1451458	aug11_g3281	381	NA	planula
scaffold_14	1486305	1486453	1486379	aug11_g3289	2822	histone -like	gastrula
scaffold_14	1486883	1487217	1487050	aug11_g3289	2058	histone -like	planula
scaffold_14	1545176	1545408	1545292	g2909	682	NA	planula
scaffold_14	1593567	1593805	1593686	g2915	1275	myosin light polypeptide 6	gastrula
scaffold_14	1618801	1619033	1618917	g2917	7037	metastasis suppressor protein 1	planula
scaffold_14	1619099	1619331	1619215	g2917	6739	metastasis suppressor protein 1	planula
scaffold_14	1619451	1619683	1619567	g2917	6387	metastasis suppressor protein 1	planula
scaffold_14	1620880	1621112	1620996	g2917	4958	metastasis suppressor protein 1	planula
scaffold_14	1622960	1623192	1623076	g2917	2878	metastasis suppressor protein 1	planula
scaffold_14	1629989	1630323	1630156	g2918	3058	NA	planula
scaffold_14	1631243	1631475	1631359	g2918	1906	NA	planula
scaffold_14	1663116	1663450	1663283	g2921	6300	NA	gastrula and planula
scaffold_14	1696339	1696571	1696455	g2924	1518	NA	planula
scaffold_14	1696707	1697041	1696874	g2924	1886	NA	planula
scaffold_14	1699843	1700075	1699959	g2924	5022	NA	planula
scaffold_14	1709757	1709989	1709873	g2927	532	NA	gastrula and planula
scaffold_14	1740262	1740494	1740378	g2929	9631	solute carrier family 22 member partial	planula
scaffold_140	60570	60802	60686	g13244	413	NA	gastrula and planula
scaffold_140	70411	70643	70527	g13245	9095	NA	planula
scaffold_140	74253	74485	74369	g13246	8271	NA	gastrula and planula
scaffold_140	118321	118553	118437	g13250	1005	NA	planula
scaffold_140	201589	201821	201705	g13258	541	NA	planula
scaffold_140	394899	395131	395015	g13272	686	myocyte enhancer factor 2c protein	gastrula and planula
scaffold_140	402489	402721	402605	g13272	8276	myocyte enhancer factor 2c protein	gastrula and planula
scaffold_140	515827	516059	515943	aug11_g15696	1112	NA	planula
scaffold_140	519996	520228	520112	aug11_g15696	2825	NA	planula
scaffold_141	32396	32628	32512	g13294	23871	dna primase small subunit	gastrula and planula
scaffold_141	32628	32860	32744	g13294	24103	dna primase small subunit	planula
scaffold_141	33155	33387	33271	g13294	24630	dna primase small subunit	planula
scaffold_141	34855	35087	34971	g13294	26330	dna primase small subunit	planula
scaffold_141	73638	73972	73805	g13295	14073	nesprin-1-like isoform 1	gastrula and planula
scaffold_141	108399	108631	108515	g13299	10665	dmrt-like family a1	gastrula and planula
scaffold_141	109136	109368	109252	g13299	9928	dmrt-like family a1	gastrula and planula
scaffold_141	109579	109811	109695	g13299	9485	dmrt-like family a1	planula
scaffold_141	110077	110309	110193	g13299	8987	dmrt-like family a1	gastrula and planula
scaffold_141	110693	110925	110809	g13299	8371	dmrt-like family a1	planula
scaffold_141	110981	111213	111097	g13299	8083	dmrt-like family a1	planula
scaffold_141	111509	111741	111625	g13299	7555	dmrt-like family a1	planula
scaffold_141	111846	112078	111962	g13299	7218	dmrt-like family a1	planula
scaffold_141	117222	117556	117389	g13299	1740	dmrt-like family a1	planula
scaffold_141	122012	122244	122128	g13299	2716	dmrt-like family a1	planula
scaffold_141	122249	122481	122365	g13299	2953	dmrt-like family a1	planula
scaffold_141	171197	171429	171313	g13302	646	NA	planula
scaffold_141	191489	191823	191656	g13303	994	NA	planula
scaffold_141	219422	219654	219538	g13307	2026	protein wnt-6-like	planula
scaffold_141	220508	220740	220624	g13307	3112	protein wnt-6-like	planula
scaffold_141	392944	393092	393018	g13322	8199	gamma-aminobutyric acid receptor subunit beta-4-like	gastrula
scaffold_141	424278	424510	424394	g13325	884	beta-site app-cleaving enzyme 2	planula
scaffold_141	475360	475592	475476	g13331	306	toll-receptor-related 2	planula
scaffold_141	498106	498338	498222	g13336	6336	NA	planula
scaffold_142	268620	268852	268736	g13365	2003	NA	planula
scaffold_142	269578	269912	269745	g13365	943	NA	gastrula and planula
scaffold_142	280766	280998	280882	g13366	507	acetoacetyl- synthetase	planula
scaffold_142	341750	341988	341869	g13376	805	NA	gastrula
scaffold_142	409919	410151	410035	g13379	7456	NA	planula
scaffold_142	491543	491775	491659	g13386	1127	eyes absent homolog 1 isoform 1	gastrula and planula
scaffold_142	493394	493626	493510	g13386	492	eyes absent homolog 1 isoform 1	planula
scaffold_142	493541	493773	493657	g13386	639	eyes absent homolog 1 isoform 1	planula
scaffold_143	230360	230694	230527	g13414	4623	NA	planula
scaffold_143	231726	231958	231842	g13414	5989	NA	gastrula and planula
scaffold_143	232627	232859	232743	g13414	6890	NA	planula
scaffold_143	242228	242460	242344	aug11_g15835	8549	lim domain only 4	planula
scaffold_143	244159	244391	244275	aug11_g15835	6618	lim domain only 4	planula
scaffold_143	249204	249436	249320	aug11_g15835	1573	lim domain only 4	planula
scaffold_143	251518	251750	251634	aug11_g15835	509	lim domain only 4	planula
scaffold_143	251910	252142	252026	aug11_g15835	901	lim domain only 4	gastrula and planula
scaffold_143	252263	252495	252379	aug11_g15835	1254	lim domain only 4	gastrula and planula
scaffold_143	252591	252739	252665	aug11_g15835	1582	lim domain only 4	gastrula
scaffold_143	253066	253298	253182	aug11_g15835	2057	lim domain only 4	gastrula and planula
scaffold_143	253348	253580	253464	aug11_g15835	2339	lim domain only 4	planula
scaffold_143	253871	254103	253987	aug11_g15835	2862	lim domain only 4	gastrula and planula
scaffold_143	255401	255639	255520	aug11_g15835	4392	lim domain only 4	gastrula
scaffold_143	259902	260134	260018	aug11_g15835	8893	lim domain only 4	planula
scaffold_143	267793	268025	267909	g13415	16431	NA	planula
scaffold_144	9949	10181	10065	g13432	1023	myosin-2 essential light chain	gastrula and planula
scaffold_144	31062	31294	31178	g13433	4337	NA	gastrula and planula
scaffold_144	45227	45459	45343	g13434	746	f-box only protein 11	planula
scaffold_144	46567	46715	46641	g13434	362	f-box only protein 11	gastrula
scaffold_144	108690	108922	108806	g13441	7053	tyrosine-protein kinase	planula
scaffold_144	109470	109702	109586	g13441	6273	tyrosine-protein kinase	planula
scaffold_144	109785	110017	109901	g13441	5958	tyrosine-protein kinase	planula
scaffold_144	169156	169304	169230	g13445	362	keratinocyte growth factor	gastrula
scaffold_144	170149	170297	170223	g13445	483	keratinocyte growth factor	gastrula
scaffold_144	300062	300210	300136	g13456	2841	NA	gastrula
scaffold_144	386614	386846	386730	g13464	3970	NA	gastrula and planula
scaffold_144	388989	389221	389105	g13464	1595	NA	planula
scaffold_144	399729	399961	399845	g13464	8913	NA	planula
scaffold_144	409637	409869	409753	g13465	7036	NA	planula
scaffold_144	409988	410136	410062	g13465	6769	NA	gastrula
scaffold_144	415939	416171	416055	g13465	734	NA	planula
scaffold_144	486157	486395	486276	g13476	1490	NA	gastrula
scaffold_145	1976	2208	2092	g13485	9008	tumor necrosis factor alpha-induced protein 8-like	planula
scaffold_145	11767	11999	11883	g13485	551	tumor necrosis factor alpha-induced protein 8-like	planula
scaffold_145	149872	150104	149988	aug11_g15927	1324	prolactin-releasing peptide receptor	planula
scaffold_145	150947	151179	151063	aug11_g15927	2399	prolactin-releasing peptide receptor	gastrula and planula
scaffold_145	208247	208479	208363	g13497	13699	heterogeneous nuclear ribonucleoprotein k	planula
scaffold_145	208743	208975	208859	g13497	13203	heterogeneous nuclear ribonucleoprotein k	planula
scaffold_145	352531	352763	352647	g13514	8946	NA	planula
scaffold_145	503584	503816	503700	g13528	16563	solute carrier organic anion transporter member 4c1	planula
scaffold_145	506115	506449	506282	g13528	19094	solute carrier organic anion transporter member 4c1	planula
scaffold_146	67719	68053	67886	g13540	27612	transforming growth factor-beta-induced protein ig-h3	planula
scaffold_146	94584	94816	94700	g13540	849	transforming growth factor-beta-induced protein ig-h3	planula
scaffold_146	96472	96704	96588	g13540	807	transforming growth factor-beta-induced protein ig-h3	planula
scaffold_146	133886	134118	134002	g13543	2371	NA	gastrula and planula
scaffold_146	211471	211703	211587	g13551	3352	t-box transcription factor tbx20	planula
scaffold_146	215693	215925	215809	g13551	638	t-box transcription factor tbx20	planula
scaffold_146	216156	216388	216272	g13551	1101	t-box transcription factor tbx20	planula
scaffold_146	221749	221981	221865	g13551	6694	t-box transcription factor tbx20	planula
scaffold_146	305343	305575	305459	g13556	879	NA	gastrula and planula
scaffold_146	345146	345378	345262	g13559	12931	protein shroom2	planula
scaffold_146	345724	346058	345891	g13559	13509	protein shroom2	gastrula and planula
scaffold_146	374076	374308	374192	g13560	896	NA	planula
scaffold_146	374326	374558	374442	g13560	646	NA	planula
scaffold_146	374538	374770	374654	g13560	434	NA	gastrula and planula
scaffold_1464	17910	18142	18026	g22145	7974	NA	planula
scaffold_147	28735	28967	28851	aug11_g16025	1910	---NA---	gastrula and planula
scaffold_147	29228	29466	29347	aug11_g16025	2403	---NA---	gastrula
scaffold_147	111405	111553	111479	aug11_g16029	2430	ras-related c3 botulinum toxin substrate 1 (rho small gtp binding protein rac1)	gastrula
scaffold_147	286563	286711	286637	g13592	629	solute carrier family 25 (mitochondrial carrier graves disease autoantigen) member 16	gastrula
scaffold_147	287802	288040	287921	g13592	462	solute carrier family 25 (mitochondrial carrier graves disease autoantigen) member 16	gastrula
scaffold_147	432918	433150	433034	g13605	1399	probable nadh dehydrogenase-like	planula
scaffold_147	434046	434278	434162	g13605	2527	probable nadh dehydrogenase-like	planula
scaffold_147	465337	465485	465411	g13610	1934	NA	gastrula
scaffold_147	466396	466628	466512	g13610	791	NA	gastrula and planula
scaffold_148	220100	220332	220216	g13638	1707	polycomb group ring finger protein 3-like	gastrula and planula
scaffold_148	241966	242198	242082	g13639	2921	polycomb group ring finger protein 5-like	planula
scaffold_148	242232	242464	242348	g13639	2655	polycomb group ring finger protein 5-like	planula
scaffold_148	242555	242787	242671	g13639	2332	polycomb group ring finger protein 5-like	planula
scaffold_148	243275	243507	243391	g13639	1612	polycomb group ring finger protein 5-like	gastrula and planula
scaffold_148	243585	243817	243701	g13639	1302	polycomb group ring finger protein 5-like	gastrula and planula
scaffold_148	244516	244748	244632	g13639	371	polycomb group ring finger protein 5-like	gastrula and planula
scaffold_148	247673	247905	247789	g13640	515	polycomb group ring finger protein 3	gastrula and planula
scaffold_148	256867	257099	256983	g13641	7480	polycomb group ring finger protein 1	planula
scaffold_148	257539	257771	257655	g13641	6808	polycomb group ring finger protein 1	planula
scaffold_148	289940	290274	290107	g13644	1375	NA	planula
scaffold_148	374456	374688	374572	g13655	1187	adam metallopeptidase domain 19	planula
scaffold_148	410529	410761	410645	g13661	354	NA	planula
scaffold_148	439266	439498	439382	g13663	1807	NA	gastrula and planula
scaffold_148	448061	448293	448177	g13664	546	NA	planula
scaffold_148	523826	524160	523993	g13676	12755	NA	planula
scaffold_149	30540	30772	30656	g13680	754	NA	planula
scaffold_149	131162	131400	131281	g13691	465	flavin-containing monooxygenase fmo gs-ox-like 3-like	gastrula
scaffold_149	132501	132739	132620	g13692	505	glucose-6-phosphate isomerase	gastrula
scaffold_149	282662	282894	282778	g13704	2644	NA	planula
scaffold_149	337338	337672	337505	g13711	4761	ku p70 dna	planula
scaffold_149	338902	339050	338976	g13711	6325	ku p70 dna	gastrula
scaffold_149	342353	342585	342469	g13712	6202	NA	planula
scaffold_149	349161	349393	349277	g13712	374	NA	planula
scaffold_149	442829	443061	442945	g13721	2642	NA	gastrula and planula
scaffold_15	316695	316927	316811	g2951	6269	chymotrypsinogen b precursor	planula
scaffold_15	317705	317937	317821	g2951	7279	chymotrypsinogen b precursor	planula
scaffold_15	547138	547370	547254	g2965	2392	voltage-gated calcium l- alpha elegans egl-19 ortholog	planula
scaffold_15	661006	661238	661122	g2971	547	NA	planula
scaffold_15	661198	661430	661314	g2971	355	NA	planula
scaffold_15	669653	669885	669769	g2971	7868	NA	planula
scaffold_15	725139	725371	725255	g2980	652	NA	planula
scaffold_15	817069	817307	817188	aug11_g3402	470	probable n-acetyltransferase 8-like	gastrula
scaffold_15	1039484	1039716	1039600	g3003	2946	uncharacterized protein c9orf172-like	planula
scaffold_15	1108344	1108576	1108460	aug11_g3421	1017	c007-h6 g-protein coupled receptor	planula
scaffold_15	1109085	1109317	1109201	aug11_g3421	1758	c007-h6 g-protein coupled receptor	planula
scaffold_15	1147095	1147429	1147262	g3010	3539	NA	gastrula and planula
scaffold_15	1150203	1150351	1150277	g3010	617	NA	gastrula
scaffold_15	1150416	1150654	1150535	g3010	314	NA	gastrula
scaffold_15	1165365	1165597	1165481	g3012	11762	NA	planula
scaffold_15	1167897	1168129	1168013	g3012	9230	NA	gastrula and planula
scaffold_15	1176093	1176331	1176212	g3012	1028	NA	gastrula
scaffold_15	1189518	1189750	1189634	g3012	12159	NA	planula
scaffold_15	1373703	1373935	1373819	g3028	2047	neuronal calcium sensor 1	gastrula and planula
scaffold_15	1373920	1374152	1374036	g3028	1830	neuronal calcium sensor 1	gastrula and planula
scaffold_15	1429856	1430088	1429972	g3032	777	neuroligin- x-linked	planula
scaffold_15	1430162	1430394	1430278	g3032	1083	neuroligin- x-linked	planula
scaffold_15	1430381	1430613	1430497	g3032	1302	neuroligin- x-linked	planula
scaffold_150	138413	138645	138529	g13745	2137	multidrug resistance-associated protein 4	gastrula and planula
scaffold_150	279875	280107	279991	g13761	502	NA	planula
scaffold_150	293873	294111	293992	g13763	1048	neuropeptide ff receptor 2	gastrula
scaffold_150	315133	315365	315249	g13764	4404	serine threonine-protein kinase 17a	planula
scaffold_150	316512	316744	316628	g13764	3025	serine threonine-protein kinase 17a	planula
scaffold_150	317211	317443	317327	g13764	2326	serine threonine-protein kinase 17a	planula
scaffold_150	317614	317846	317730	g13764	1923	serine threonine-protein kinase 17a	planula
scaffold_150	318096	318328	318212	g13764	1441	serine threonine-protein kinase 17a	gastrula and planula
scaffold_150	409113	409351	409232	g13772	646	NA	gastrula
scaffold_150	415773	416005	415889	g13773	667	liver stage antigen 3	planula
scaffold_151	81558	81892	81725	g13786	4463	NA	planula
scaffold_151	237380	237612	237496	g13798	8349	noggin	planula
scaffold_151	268972	269204	269088	g13799	301	u3 small nucleolar rna-associated protein 6 homolog	gastrula and planula
scaffold_151	355673	355821	355747	g13807	3645	NA	gastrula
scaffold_152	62233	62465	62349	g13827	3317	deleted in malignant brain tumors 1	gastrula and planula
scaffold_153	40331	40563	40447	g13861	1563	nhl repeat containing protein	planula
scaffold_153	69150	69382	69266	g13865	773	potassium channel	planula
scaffold_153	353777	354111	353944	g13887	916	NA	planula
scaffold_153	365976	366208	366092	g13888	1664	not homeobox transcription factor	gastrula and planula
scaffold_153	373373	373605	373489	g13889	3027	eh domain binding protein 1-like 1	planula
scaffold_153	376000	376232	376116	g13889	400	eh domain binding protein 1-like 1	planula
scaffold_153	377362	377594	377478	g13889	730	eh domain binding protein 1-like 1	planula
scaffold_153	377580	377812	377696	g13889	948	eh domain binding protein 1-like 1	planula
scaffold_153	378841	379079	378960	g13889	2209	eh domain binding protein 1-like 1	gastrula
scaffold_153	379410	379642	379526	g13889	2778	eh domain binding protein 1-like 1	planula
scaffold_153	379604	379836	379720	g13889	2972	eh domain binding protein 1-like 1	planula
scaffold_153	380571	380803	380687	g13889	3939	eh domain binding protein 1-like 1	planula
scaffold_153	380836	381068	380952	g13889	4204	eh domain binding protein 1-like 1	planula
scaffold_153	391264	391496	391380	g13890	4085	NA	planula
scaffold_153	391648	391880	391764	g13890	3701	NA	planula
scaffold_153	392111	392343	392227	g13890	3238	NA	planula
scaffold_153	392373	392605	392489	g13890	2976	NA	planula
scaffold_153	528494	528726	528610	g13905	11513	copper homeostasis protein cutc homolog	gastrula and planula
scaffold_153	529127	529365	529246	g13905	12146	copper homeostasis protein cutc homolog	gastrula
scaffold_154	142133	142365	142249	g13918	361	protein disulfide-isomerase precursor	planula
scaffold_154	213407	213639	213523	g13922	894	NA	planula
scaffold_154	213669	213901	213785	g13922	1156	NA	planula
scaffold_154	291421	291653	291537	g13928	10639	calcium voltage- t alpha 1i subunit	planula
scaffold_154	347535	347767	347651	g13932	3113	netrin 1	planula
scaffold_154	349128	349360	349244	g13932	4706	netrin 1	planula
scaffold_154	350106	350338	350222	g13932	5684	netrin 1	planula
scaffold_154	351862	352094	351978	g13932	7440	netrin 1	gastrula and planula
scaffold_154	352138	352370	352254	g13932	7716	netrin 1	gastrula and planula
scaffold_154	352462	352700	352581	g13932	8040	netrin 1	gastrula
scaffold_154	353750	353982	353866	g13932	9328	netrin 1	planula
scaffold_154	353940	354172	354056	g13932	9518	netrin 1	planula
scaffold_155	159500	159738	159619	g13948	4457	NA	gastrula
scaffold_155	160298	160530	160414	g13948	3665	NA	planula
scaffold_155	160491	160723	160607	g13948	3472	NA	planula
scaffold_155	168806	169038	168922	g13948	4611	NA	planula
scaffold_155	421662	421900	421781	aug11_g16503	10184	NA	gastrula
scaffold_155	490760	490992	490876	g13967	640	contactin associated 2	planula
scaffold_156	250910	251244	251077	g14001	402	NA	planula
scaffold_156	303679	303911	303795	g14002	6015	potassium voltage-gated channel protein eag-like	planula
scaffold_156	310442	310674	310558	g14002	516	potassium voltage-gated channel protein eag-like	planula
scaffold_156	319222	319454	319338	g14003	2812	fibroblast growth factor 24	planula
scaffold_156	319631	319965	319798	g14003	2301	fibroblast growth factor 24	planula
scaffold_156	443210	443442	443326	g14013	413	ras-related protein rab-32	planula
scaffold_156	531626	531858	531742	g14019	700	NA	planula
scaffold_1563	19211	19443	19327	g22283	5522	NA	planula
scaffold_157	119869	120203	120036	g14030	994	fh1 fh2 domain-containing protein 3-like	planula
scaffold_157	142973	143211	143092	g14034	2534	NA	gastrula
scaffold_157	146271	146509	146390	g14034	526	NA	gastrula
scaffold_157	154245	154477	154361	g14035	4509	NA	planula
scaffold_157	154697	155031	154864	g14035	4961	NA	planula
scaffold_157	215751	215899	215825	g14043	444	NA	gastrula
scaffold_157	300539	300771	300655	aug11_g16599	7985	protein phosphatase 1 regulatory subunit 12a	gastrula and planula
scaffold_157	301353	301585	301469	aug11_g16599	7171	protein phosphatase 1 regulatory subunit 12a	gastrula and planula
scaffold_157	302023	302255	302139	aug11_g16599	6501	protein phosphatase 1 regulatory subunit 12a	planula
scaffold_157	304871	305103	304987	aug11_g16599	3653	protein phosphatase 1 regulatory subunit 12a	planula
scaffold_157	306578	306810	306694	aug11_g16599	1946	protein phosphatase 1 regulatory subunit 12a	planula
scaffold_157	309618	309850	309734	aug11_g16599	862	protein phosphatase 1 regulatory subunit 12a	planula
scaffold_157	309992	310224	310108	aug11_g16599	1236	protein phosphatase 1 regulatory subunit 12a	planula
scaffold_157	310486	310718	310602	aug11_g16599	1730	protein phosphatase 1 regulatory subunit 12a	planula
scaffold_157	311013	311245	311129	aug11_g16599	2257	protein phosphatase 1 regulatory subunit 12a	gastrula and planula
scaffold_157	328891	329123	329007	g14052	1698	NA	planula
scaffold_157	383970	384118	384044	aug11_g16606	1094	transcription factor maf	gastrula
scaffold_157	385728	385960	385844	aug11_g16606	516	transcription factor maf	planula
scaffold_157	401487	401719	401603	g14059	3151	nuclear receptor coactivator 5	planula
scaffold_157	402235	402467	402351	g14059	2403	nuclear receptor coactivator 5	gastrula and planula
scaffold_157	490996	491144	491070	g14065	605	histone h2b 1 2-like	gastrula
scaffold_158	92020	92168	92094	g14088	604	NA	gastrula
scaffold_158	126327	126559	126443	g14092	1167	NA	planula
scaffold_158	126593	126825	126709	g14092	901	NA	gastrula and planula
scaffold_158	126939	127171	127055	g14092	555	NA	planula
scaffold_158	215048	215196	215122	g14097	3929	NA	gastrula
scaffold_158	263284	263516	263400	g14100	638	NA	planula
scaffold_158	354405	354553	354479	aug11_g16674	1222	glycoprotein 3-alpha-l-fucosyltransferase a	gastrula
scaffold_158	355147	355379	355263	aug11_g16674	1964	glycoprotein 3-alpha-l-fucosyltransferase a	planula
scaffold_158	398533	398765	398649	g14112	2498	fibroblast growth factor isoform cra_b	gastrula and planula
scaffold_158	490288	490520	490404	g14117	515	NA	planula
scaffold_1580	18318	18556	18437	g22299	2923	NA	gastrula
scaffold_159	129090	129322	129206	g14123	11013	paired box 3	gastrula and planula
scaffold_159	139679	139911	139795	g14123	424	paired box 3	gastrula and planula
scaffold_16	45896	46128	46012	g3055	4561	isoform c	planula
scaffold_16	132054	132388	132221	g3062	2557	NA	gastrula and planula
scaffold_16	133603	133835	133719	g3062	1110	NA	planula
scaffold_16	269052	269290	269171	g3076	477	udp-n-acetylglucosamine--peptide n-acetylglucosaminyltransferase 110 kda subunit isoform 2	gastrula
scaffold_16	271142	271380	271261	g3077	1154	tmsb4x protein	gastrula
scaffold_16	271962	272194	272078	g3077	1974	tmsb4x protein	planula
scaffold_16	272372	272604	272488	g3078	1664	progesterone receptor membrane component 2	gastrula and planula
scaffold_16	272727	272959	272843	g3078	1309	progesterone receptor membrane component 2	planula
scaffold_16	272957	273189	273073	g3078	1079	progesterone receptor membrane component 2	planula
scaffold_16	322963	323201	323082	g3085	11216	NA	gastrula
scaffold_16	432902	433236	433069	g3093	8878	copper-transporting atpase 1	planula
scaffold_16	504206	504540	504373	g3099	1544	guanylate cyclase soluble subunit beta-1	planula
scaffold_16	523444	523676	523560	g3101	1040	guanylate cyclase soluble subunit alpha-2	gastrula and planula
scaffold_16	543831	544063	543947	g3103	403	guanylate cyclase soluble subunit beta-1	planula
scaffold_16	568149	568381	568265	g3107	3267	paired box 6	gastrula and planula
scaffold_16	568448	568680	568564	g3107	2968	paired box 6	gastrula and planula
scaffold_16	568995	569233	569114	g3107	2415	paired box 6	gastrula
scaffold_16	573241	573473	573357	g3107	1593	paired box 6	gastrula and planula
scaffold_16	573876	574108	573992	g3107	2228	paired box 6	planula
scaffold_16	577955	578187	578071	g3107	6307	paired box 6	planula
scaffold_16	578774	579108	578941	g3107	7126	paired box 6	planula
scaffold_16	580042	580274	580158	g3107	8394	paired box 6	planula
scaffold_16	619913	620247	620080	g3110	1074	NA	gastrula and planula
scaffold_16	638078	638226	638152	g3112	1042	NA	gastrula
scaffold_16	638418	638650	638534	g3112	618	NA	gastrula and planula
scaffold_16	639608	639840	639724	g3112	340	NA	gastrula and planula
scaffold_16	650748	651082	650915	g3113	2179	NA	planula
scaffold_16	670204	670538	670371	aug11_g3551	827	NA	planula
scaffold_16	670565	670797	670681	aug11_g3551	568	NA	planula
scaffold_16	776434	776666	776550	g3122	933	fibroblast growth factor receptor 2 (bacteria-expressed keratinocyte growth factor craniofacial dysostosis crouzon pfeiffer jackson-weiss syndrome) isoform cra_h	planula
scaffold_16	778725	778957	778841	g3122	1126	fibroblast growth factor receptor 2 (bacteria-expressed keratinocyte growth factor craniofacial dysostosis crouzon pfeiffer jackson-weiss syndrome) isoform cra_h	gastrula and planula
scaffold_16	779671	780005	779838	g3122	2072	fibroblast growth factor receptor 2 (bacteria-expressed keratinocyte growth factor craniofacial dysostosis crouzon pfeiffer jackson-weiss syndrome) isoform cra_h	planula
scaffold_16	821037	821371	821204	g3124	918	NA	planula
scaffold_16	864492	864724	864608	aug11_g3565	3622	---NA---	planula
scaffold_16	865466	865698	865582	aug11_g3565	2648	---NA---	planula
scaffold_16	992174	992406	992290	g3138	1109	NA	planula
scaffold_16	1009420	1009658	1009539	g3139	485	NA	gastrula
scaffold_16	1045373	1045605	1045489	g3142	990	gamma-aminobutyric acid type b receptor subunit 2-like	planula
scaffold_16	1065408	1065640	1065524	g3144	809	pou class transcription factor 3	planula
scaffold_16	1068321	1068559	1068440	g3144	1872	pou class transcription factor 3	gastrula
scaffold_16	1071554	1071702	1071628	g3144	5105	pou class transcription factor 3	gastrula
scaffold_16	1091472	1091620	1091546	g3146	2088	NA	gastrula
scaffold_16	1097743	1097975	1097859	g3147	524	protein phosphatase-7	gastrula and planula
scaffold_16	1098298	1098632	1098465	g3147	1079	protein phosphatase-7	planula
scaffold_16	1155936	1156168	1156052	g3153	928	bone morphogenetic protein 5	gastrula and planula
scaffold_16	1164754	1164902	1164828	g3154	3646	NA	gastrula
scaffold_16	1345093	1345325	1345209	g3169	1625	potassium voltage-gated channel subfamily h member 7	planula
scaffold_16	1434939	1435171	1435055	aug11_g3621	342	NA	gastrula and planula
scaffold_16	1436298	1436530	1436414	aug11_g3621	1701	NA	planula
scaffold_16	1522956	1523104	1523030	g3191	6525	NA	gastrula
scaffold_16	1643775	1644013	1643894	g3195	10801	c2 domain-containing protein 3	gastrula
scaffold_16	1644291	1644625	1644458	g3195	10189	c2 domain-containing protein 3	gastrula and planula
scaffold_160	43811	44043	43927	g14155	10385	NA	gastrula and planula
scaffold_160	43997	44229	44113	g14155	10571	NA	gastrula and planula
scaffold_160	55936	56168	56052	aug11_g16733	418	gtp-binding protein di-ras2-like	planula
scaffold_160	58112	58344	58228	aug11_g16733	1526	gtp-binding protein di-ras2-like	planula
scaffold_160	58935	59167	59051	aug11_g16733	2349	gtp-binding protein di-ras2-like	planula
scaffold_160	59424	59656	59540	aug11_g16733	2838	gtp-binding protein di-ras2-like	planula
scaffold_160	61029	61261	61145	aug11_g16733	4443	gtp-binding protein di-ras2-like	gastrula and planula
scaffold_160	61488	61720	61604	aug11_g16733	4902	gtp-binding protein di-ras2-like	planula
scaffold_160	193380	193618	193499	g14168	321	NA	gastrula
scaffold_160	196568	196806	196687	g14168	3509	NA	gastrula
scaffold_160	258986	259134	259060	g14176	3127	NA	gastrula
scaffold_160	332177	332409	332293	g14181	2250	protein naked cuticle homolog 2	gastrula and planula
scaffold_160	333103	333335	333219	g14181	1324	protein naked cuticle homolog 2	gastrula and planula
scaffold_160	333597	333829	333713	g14181	830	protein naked cuticle homolog 2	planula
scaffold_160	403817	404049	403933	g14187	5594	protein cbfa2t1	planula
scaffold_160	408007	408239	408123	g14187	1404	protein cbfa2t1	gastrula and planula
scaffold_160	409108	409256	409182	g14187	387	protein cbfa2t1	gastrula
scaffold_160	449465	449697	449581	g14192	493	dopamine d1 beta receptor	gastrula and planula
scaffold_160	480330	480478	480404	g14193	15138	NA	gastrula
scaffold_160	481318	481550	481434	g14193	16126	NA	planula
scaffold_161	20594	20742	20668	g14197	4083	NA	gastrula
scaffold_161	21653	21885	21769	g14197	2940	NA	gastrula and planula
scaffold_161	231400	231632	231516	g14221	703	fermitin family homolog 2	planula
scaffold_162	176006	176238	176122	g14254	6324	yeats domain-containing protein 2	planula
scaffold_162	186822	186970	186896	aug11_g16846	1298	pr domain zinc finger protein 12	gastrula
scaffold_162	194676	194824	194750	aug11_g16846	9152	pr domain zinc finger protein 12	gastrula
scaffold_162	281058	281290	281174	g14264	6691	laminin subunit gamma-1	planula
scaffold_162	300193	300425	300309	g14265	2896	laminin subunit gamma-1 precursor	planula
scaffold_162	324139	324371	324255	g14268	371	laminin subunit beta-1	planula
scaffold_162	356922	357070	356996	g14273	5376	NA	gastrula
scaffold_162	395845	396077	395961	g14275	1999	NA	planula
scaffold_162	502070	502302	502186	g14280	3704	NA	planula
scaffold_163	110676	110908	110792	g14291	39957	canalicular multispecific organic anion transporter 2-like	planula
scaffold_163	234823	234971	234897	aug11_g16895	958	aggrecan core	gastrula
scaffold_163	265532	265764	265648	g14301	2802	NA	gastrula and planula
scaffold_163	313532	313764	313648	g14307	11675	NA	gastrula and planula
scaffold_163	346130	346278	346204	g14309	1521	mesoglein variant 1	gastrula
scaffold_163	346965	347197	347081	g14309	602	mesoglein variant 1	gastrula and planula
scaffold_163	365144	365376	365260	g14310	4529	NA	planula
scaffold_164	93174	93406	93290	g14337	6819	NA	planula
scaffold_164	158184	158416	158300	g14341	758	chondroitin sulfate proteoglycan 4-like	gastrula and planula
scaffold_164	168168	168400	168284	g14342	385	NA	gastrula and planula
scaffold_164	211145	211377	211261	g14346	5516	homeobox protein meis2	planula
scaffold_164	211634	211968	211801	g14346	4925	homeobox protein meis2	planula
scaffold_164	212123	212355	212239	g14346	4538	homeobox protein meis2	planula
scaffold_164	217326	217558	217442	g14346	433	homeobox protein meis2	gastrula and planula
scaffold_164	217604	217836	217720	g14346	711	homeobox protein meis2	planula
scaffold_164	218050	218282	218166	g14346	1157	homeobox protein meis2	planula
scaffold_164	219162	219394	219278	g14346	2269	homeobox protein meis2	planula
scaffold_164	220952	221100	221026	aug11_g16943	1700	NA	gastrula
scaffold_164	221894	222126	222010	aug11_g16943	674	NA	gastrula and planula
scaffold_164	222217	222449	222333	aug11_g16943	351	NA	planula
scaffold_164	223349	223581	223465	aug11_g16943	549	NA	planula
scaffold_164	231435	231673	231554	aug11_g16943	8635	NA	gastrula
scaffold_164	231779	232011	231895	aug11_g16943	8979	NA	planula
scaffold_164	233341	233573	233457	aug11_g16943	10541	NA	planula
scaffold_164	233689	233921	233805	aug11_g16943	10889	NA	planula
scaffold_164	234645	234979	234812	aug11_g16943	11845	NA	planula
scaffold_164	245411	245643	245527	g14347	7480	NA	planula
scaffold_164	266144	266382	266263	g14350	600	NA	gastrula
scaffold_164	266940	267172	267056	g14350	1396	NA	gastrula and planula
scaffold_164	267387	267619	267503	g14350	1843	NA	planula
scaffold_164	267667	267899	267783	g14350	2123	NA	gastrula and planula
scaffold_164	489876	490108	489992	g14365	12054	NA	planula
scaffold_165	200696	200928	200812	g14390	9931	NA	gastrula and planula
scaffold_165	204958	205292	205125	g14390	5567	NA	planula
scaffold_165	473175	473509	473342	g14410	627	aldehyde reductase	planula
scaffold_166	84254	84486	84370	g14420	858	NA	gastrula and planula
scaffold_166	244033	244181	244107	g14426	1299	a disintegrin and metalloproteinase with thrombospondin motifs 9	gastrula
scaffold_166	244582	244820	244701	g14426	1848	a disintegrin and metalloproteinase with thrombospondin motifs 9	gastrula
scaffold_166	305673	305911	305792	aug11_g17030	1086	udp-gal:beta c beta -galactosyltransferase i	gastrula
scaffold_166	398371	398603	398487	g14439	1213	follistatin-related protein 1 precursor	planula
scaffold_166	471503	471735	471619	g14448	5383	NA	planula
scaffold_166	487349	487581	487465	g14449	4268	protein cwc15 homolog	planula
scaffold_166	487687	487919	487803	g14449	3930	protein cwc15 homolog	planula
scaffold_167	40722	40960	40841	g14460	6466	NA	gastrula
scaffold_167	43163	43311	43237	g14460	8907	NA	gastrula
scaffold_167	134151	134383	134267	g14468	6452	NA	planula
scaffold_167	135225	135457	135341	g14468	5378	NA	gastrula and planula
scaffold_167	136029	136261	136145	g14468	4574	NA	gastrula and planula
scaffold_167	137151	137383	137267	g14468	3452	NA	gastrula and planula
scaffold_167	137620	137852	137736	g14468	2983	NA	gastrula and planula
scaffold_167	138563	138795	138679	g14468	2040	NA	gastrula and planula
scaffold_167	141956	142188	142072	g14468	1121	NA	gastrula and planula
scaffold_167	318174	318508	318341	aug11_g17090	2179	NA	planula
scaffold_167	323031	323263	323147	aug11_g17090	2344	NA	gastrula and planula
scaffold_167	323538	323770	323654	aug11_g17090	2851	NA	gastrula and planula
scaffold_167	400549	400781	400665	g14484	494	PREDICTED: similar to predicted protein [Hydra magnipapillata]	planula
scaffold_168	40667	40905	40786	g14501	11130	NA	gastrula
scaffold_168	40930	41168	41049	g14501	10867	NA	gastrula
scaffold_168	134534	134868	134701	g14506	558	prolyl 4-hydroxylase subunit alpha-1 isoform 2 precursor	planula
scaffold_168	169938	170170	170054	g14508	872	protein atonal homolog 8	planula
scaffold_168	185813	186147	185980	g14509	2794	neurogenic differentiation factor 1	planula
scaffold_168	187080	187312	187196	g14509	1629	neurogenic differentiation factor 1	planula
scaffold_168	190198	190430	190314	g14509	1257	neurogenic differentiation factor 1	planula
scaffold_168	191154	191488	191321	g14509	2213	neurogenic differentiation factor 1	gastrula and planula
scaffold_168	207704	208038	207871	g14509	18763	neurogenic differentiation factor 1	planula
scaffold_168	216453	216685	216569	g14510	26195	dna-directed rna polymerase iii subunit rpc1	planula
scaffold_168	263112	263344	263228	g14514	1587	NA	gastrula and planula
scaffold_168	263713	263945	263829	g14514	986	NA	gastrula and planula
scaffold_169	81377	81615	81496	g14545	3530	NA	gastrula
scaffold_169	117643	117875	117759	aug11_g17172	1188	NA	planula
scaffold_169	117967	118199	118083	aug11_g17172	1512	NA	gastrula and planula
scaffold_169	187377	187525	187451	g14557	1448	protein xrp2	gastrula
scaffold_169	275442	275674	275558	g14564	2178	NA	planula
scaffold_169	276328	276560	276444	g14564	1292	NA	planula
scaffold_169	280509	280741	280625	g14564	2657	NA	gastrula and planula
scaffold_169	388842	389074	388958	g14573	5397	calcium calmodulin-dependent protein kinase id	planula
scaffold_169	389099	389331	389215	g14573	5140	calcium calmodulin-dependent protein kinase id	planula
scaffold_17	65791	65939	65865	aug11_g3651	537	NA	gastrula
scaffold_17	306440	306672	306556	g3229	336	NA	planula
scaffold_17	329660	329892	329776	g3231	416	serine threonine-protein kinase nim1	planula
scaffold_17	330281	330513	330397	g3231	1037	serine threonine-protein kinase nim1	planula
scaffold_17	376606	376838	376722	g3236	3870	epoxide hydrolase 4	planula
scaffold_17	435814	436046	435930	aug11_g3696	608	NA	planula
scaffold_17	466214	466446	466330	g3247	1856	homeobox protein	planula
scaffold_17	499165	499397	499281	g3251	437	neurofascin isoform 2	planula
scaffold_17	503033	503265	503149	g3251	4305	neurofascin isoform 2	planula
scaffold_17	503591	503829	503710	g3251	4863	neurofascin isoform 2	gastrula
scaffold_17	506380	506612	506496	g3251	7652	neurofascin isoform 2	gastrula and planula
scaffold_17	506734	506966	506850	g3251	8006	neurofascin isoform 2	gastrula and planula
scaffold_17	507729	507961	507845	g3251	9001	neurofascin isoform 2	planula
scaffold_17	530963	531201	531082	g3252	1987	filamin-a isoform 1	gastrula
scaffold_17	531236	531384	531310	g3252	1804	filamin-a isoform 1	gastrula
scaffold_17	532583	532815	532699	g3252	373	filamin-a isoform 1	planula
scaffold_17	533768	534000	533884	g3252	580	filamin-a isoform 1	gastrula and planula
scaffold_17	769687	769919	769803	g3276	7616	NA	planula
scaffold_17	782248	782480	782364	g3276	4713	NA	planula
scaffold_17	782510	782742	782626	g3276	4975	NA	planula
scaffold_17	849537	849769	849653	g3283	15766	receptor-type tyrosine-protein phosphatase delta	gastrula and planula
scaffold_17	849843	850075	849959	g3283	15460	receptor-type tyrosine-protein phosphatase delta	gastrula and planula
scaffold_17	850442	850674	850558	g3283	14861	receptor-type tyrosine-protein phosphatase delta	gastrula and planula
scaffold_17	863786	864018	863902	g3283	1517	receptor-type tyrosine-protein phosphatase delta	gastrula and planula
scaffold_17	864078	864310	864194	g3283	1225	receptor-type tyrosine-protein phosphatase delta	planula
scaffold_17	864782	865014	864898	g3283	521	receptor-type tyrosine-protein phosphatase delta	planula
scaffold_17	871673	871905	871789	g3283	6138	receptor-type tyrosine-protein phosphatase delta	planula
scaffold_17	873863	874197	874030	g3283	8328	receptor-type tyrosine-protein phosphatase delta	planula
scaffold_17	911082	911314	911198	g3290	1151	NA	planula
scaffold_17	911394	911626	911510	g3290	839	NA	planula
scaffold_17	931138	931376	931257	g3292	3642	transient receptor potential cation channel subfamily a member 1	gastrula
scaffold_17	931422	931654	931538	g3292	3926	transient receptor potential cation channel subfamily a member 1	planula
scaffold_17	1335720	1335952	1335836	g3329	404	NA	planula
scaffold_17	1532592	1532824	1532708	g3342	993	NA	planula
scaffold_17	1582291	1582523	1582407	g3345	783	voltage-dependent calcium channel type d subunit alpha-1-like	planula
scaffold_17	1638407	1638639	1638523	g3348	1189	neuroligin- x-linked	gastrula and planula
scaffold_17	1638666	1638814	1638740	g3348	1014	neuroligin- x-linked	gastrula
scaffold_170	67401	67633	67517	g14587	5825	natriuretic peptide receptor 1-like	planula
scaffold_170	312767	312999	312883	g14603	3467	NA	planula
scaffold_170	314574	314806	314690	g14603	1660	NA	planula
scaffold_170	483884	484116	484000	g14617	3793	NA	planula
scaffold_170	486743	486975	486859	g14617	934	NA	planula
scaffold_170	488770	489008	488889	g14617	861	NA	gastrula
scaffold_170	496781	497019	496900	g14618	1002	NA	gastrula
scaffold_171	59839	60071	59955	g14623	793	hmg box-containing protein 1-like	planula
scaffold_171	60644	60876	60760	g14623	1598	hmg box-containing protein 1-like	planula
scaffold_171	383721	383953	383837	g14649	9463	protein camp- beta	planula
scaffold_171	392855	393087	392971	g14649	329	protein camp- beta	gastrula and planula
scaffold_171	446516	446748	446632	g14654	349	aldehyde oxidase	gastrula and planula
scaffold_172	122149	122381	122265	g14669	1144	NA	planula
scaffold_172	122538	122770	122654	g14669	755	NA	gastrula and planula
scaffold_172	204170	204408	204289	g14676	1072	band -like protein 3	gastrula
scaffold_172	314350	314588	314469	g14685	471	NA	gastrula
scaffold_172	326812	327044	326928	g14687	4735	NA	planula
scaffold_172	327503	327735	327619	g14687	4044	NA	planula
scaffold_172	328727	328959	328843	g14687	2820	NA	planula
scaffold_172	409658	409806	409732	g14694	8851	isoform cra_c	gastrula
scaffold_173	47455	47687	47571	aug11_g17353	2198	NA	gastrula and planula
scaffold_173	67144	67376	67260	g14712	480	NA	planula
scaffold_173	69157	69389	69273	g14712	1301	NA	planula
scaffold_173	69668	69900	69784	g14712	1812	NA	planula
scaffold_173	145385	145623	145504	g14718	530	NA	gastrula
scaffold_173	145543	145781	145662	g14718	688	NA	gastrula
scaffold_173	165723	165955	165839	g14720	5518	rh-related protein	planula
scaffold_173	198177	198409	198293	g14722	354	rh-related protein	gastrula and planula
scaffold_173	215795	216027	215911	g14725	5211	von willebrand factor type a	planula
scaffold_173	226790	227022	226906	g14726	4886	NA	gastrula and planula
scaffold_173	228322	228656	228489	g14726	6418	NA	planula
scaffold_173	231430	231662	231546	g14727	4262	doublesex-mab related 99b	planula
scaffold_173	231893	232131	232012	g14727	3793	doublesex-mab related 99b	gastrula
scaffold_173	241747	242081	241914	g14727	5823	doublesex-mab related 99b	gastrula and planula
scaffold_173	242622	242770	242696	g14727	6698	doublesex-mab related 99b	gastrula
scaffold_173	244324	244658	244491	g14728	6106	NA	gastrula and planula
scaffold_173	245799	246133	245966	g14728	4631	NA	planula
scaffold_173	271111	271343	271227	g14730	1718	NA	planula
scaffold_173	277264	277496	277380	g14731	2340	NA	gastrula and planula
scaffold_173	433639	433787	433713	g14748	3244	protein tyrosine receptor d	gastrula
scaffold_173	434096	434328	434212	g14748	2703	protein tyrosine receptor d	gastrula and planula
scaffold_174	38166	38398	38282	g14752	448	serine threonine-protein kinase lats1	planula
scaffold_174	369725	369957	369841	g14783	10757	NA	planula
scaffold_174	369999	370231	370115	g14783	10483	NA	planula
scaffold_174	371154	371386	371270	g14783	9328	NA	planula
scaffold_174	378453	378685	378569	g14783	2029	NA	planula
scaffold_174	379133	379365	379249	g14783	1349	NA	planula
scaffold_174	385485	385717	385601	g14783	4771	NA	planula
scaffold_174	413388	413620	413504	aug11_g17445	947	octopamine receptor beta-2r	gastrula and planula
scaffold_175	70770	71002	70886	g14787	533	NA	planula
scaffold_175	296105	296337	296221	g14806	690	NA	planula
scaffold_175	305989	306137	306063	g14806	8962	NA	gastrula
scaffold_175	390510	390742	390626	g14815	493	elmo domain-containing protein 2	planula
scaffold_176	206537	206769	206653	g14842	1530	NA	planula
scaffold_176	232137	232369	232253	g14846	518	collagen triple helix repeat containing 1	planula
scaffold_177	118499	118647	118573	g14878	8823	NA	gastrula
scaffold_177	150042	150376	150209	g14879	4249	NA	planula
scaffold_177	260551	260783	260667	g14890	1042	NA	gastrula and planula
scaffold_177	276694	276926	276810	aug11_g17578	2917	zinc finger protein zic 1-like	planula
scaffold_177	291874	292208	292041	aug11_g17578	12031	zinc finger protein zic 1-like	gastrula and planula
scaffold_177	296481	296713	296597	aug11_g17579	7900	zinc finger protein zic 3	gastrula and planula
scaffold_177	297866	298098	297982	aug11_g17579	6515	zinc finger protein zic 3	planula
scaffold_177	300981	301315	301148	aug11_g17579	3298	zinc finger protein zic 3	planula
scaffold_177	301358	301590	301474	aug11_g17579	3023	zinc finger protein zic 3	planula
scaffold_177	301685	301917	301801	aug11_g17579	2696	zinc finger protein zic 3	planula
scaffold_177	302073	302305	302189	aug11_g17579	2308	zinc finger protein zic 3	planula
scaffold_177	303151	303485	303318	aug11_g17579	1128	zinc finger protein zic 3	planula
scaffold_177	304938	305170	305054	aug11_g17579	325	zinc finger protein zic 3	planula
scaffold_177	306848	307080	306964	aug11_g17579	2235	zinc finger protein zic 3	planula
scaffold_177	307092	307324	307208	aug11_g17579	2479	zinc finger protein zic 3	planula
scaffold_177	318344	318492	318418	g14892	3472	NA	gastrula
scaffold_177	324262	324494	324378	g14892	2298	NA	gastrula and planula
scaffold_177	351531	351763	351647	g14897	1212	potassium channel subfamily k member 3	planula
scaffold_177	352397	352629	352513	g14897	2078	potassium channel subfamily k member 3	planula
scaffold_177	366552	366700	366626	aug11_g17586	1870	g patch domain-containing protein 4	gastrula
scaffold_177	394534	394766	394650	g14902	2885	potassium channel homolog	planula
scaffold_177	396421	396653	396537	g14902	4772	potassium channel homolog	planula
scaffold_177	407374	407708	407541	g14903	710	voltage-gated potassium channel	planula
scaffold_177	475886	476118	476002	aug11_g17601	544	protein phosphatase 1 regulatory subunit 12b	planula
scaffold_177	476735	476967	476851	aug11_g17601	1393	protein phosphatase 1 regulatory subunit 12b	gastrula and planula
scaffold_177	477250	477482	477366	aug11_g17601	1908	protein phosphatase 1 regulatory subunit 12b	planula
scaffold_177	478738	478970	478854	aug11_g17601	3396	protein phosphatase 1 regulatory subunit 12b	planula
scaffold_178	358654	358886	358770	g14935	1063	NA	planula
scaffold_178	359068	359216	359142	g14935	733	NA	gastrula
scaffold_178	375009	375241	375125	g14937	4000	NA	planula
scaffold_178	444236	444468	444352	g14944	1484	NA	planula
scaffold_178	449366	449598	449482	g14945	335	NA	planula
scaffold_178	465340	465572	465456	g14946	977	protein apcdd1 precursor	planula
scaffold_178	465946	466178	466062	g14946	1583	protein apcdd1 precursor	gastrula and planula
scaffold_178	466288	466520	466404	g14946	1925	protein apcdd1 precursor	planula
scaffold_178	466530	466762	466646	g14946	2167	protein apcdd1 precursor	planula
scaffold_178	467451	467683	467567	g14946	3088	protein apcdd1 precursor	planula
scaffold_178	468640	468872	468756	g14946	4277	protein apcdd1 precursor	planula
scaffold_178	468948	469180	469064	g14946	4585	protein apcdd1 precursor	planula
scaffold_178	469610	469842	469726	g14946	5247	protein apcdd1 precursor	gastrula and planula
scaffold_178	469886	470220	470053	g14946	5523	protein apcdd1 precursor	planula
scaffold_178	470936	471168	471052	g14946	6573	protein apcdd1 precursor	gastrula and planula
scaffold_178	471262	471596	471429	g14946	6899	protein apcdd1 precursor	planula
scaffold_178	471662	471894	471778	g14946	7299	protein apcdd1 precursor	planula
scaffold_179	361002	361234	361118	g14974	5392	carbonic anhydrase	planula
scaffold_18	62382	62614	62498	g3358	18601	poly (adp-ribose) polymerase member 1	planula
scaffold_18	127949	128181	128065	g3366	2425	trerf1 protein	gastrula and planula
scaffold_18	128505	128737	128621	g3366	1869	trerf1 protein	gastrula and planula
scaffold_18	128974	129206	129090	g3366	1400	trerf1 protein	gastrula and planula
scaffold_18	129463	129695	129579	g3366	911	trerf1 protein	gastrula and planula
scaffold_18	142015	142247	142131	g3367	5929	transcriptional-regulating factor 1	gastrula and planula
scaffold_18	142789	142937	142863	g3367	6703	transcriptional-regulating factor 1	gastrula
scaffold_18	242514	242746	242630	g3380	1074	usher syndrome 2a (autosomal mild)	planula
scaffold_18	415887	416035	415961	g3393	655	NA	gastrula
scaffold_18	425597	425829	425713	aug11_g3861	675	NA	planula
scaffold_18	435615	435847	435731	g3394	4455	NA	planula
scaffold_18	474313	474545	474429	aug11_g3869	2939	NA	gastrula and planula
scaffold_18	475236	475468	475352	aug11_g3869	3862	NA	gastrula and planula
scaffold_18	502901	503049	502975	g3403	7761	28s ribosomal protein mitochondrial	gastrula
scaffold_18	651093	651241	651167	g3415	8478	neurocan core protein precursor	gastrula
scaffold_18	1160465	1160799	1160632	g3443	4725	NA	planula
scaffold_18	1167076	1167308	1167192	g3444	1107	NA	gastrula and planula
scaffold_18	1168531	1168763	1168647	g3445	437	solute carrier family 8 (sodium calcium exchanger) member isoform cra_f	gastrula and planula
scaffold_18	1171419	1171651	1171535	g3445	2219	solute carrier family 8 (sodium calcium exchanger) member isoform cra_f	planula
scaffold_18	1171723	1171955	1171839	g3445	2523	solute carrier family 8 (sodium calcium exchanger) member isoform cra_f	gastrula and planula
scaffold_18	1171949	1172181	1172065	g3445	2749	solute carrier family 8 (sodium calcium exchanger) member isoform cra_f	planula
scaffold_18	1221949	1222181	1222065	g3449	1507	inositol-trisphosphate 3-kinase b	planula
scaffold_18	1224384	1224616	1224500	g3449	696	inositol-trisphosphate 3-kinase b	gastrula and planula
scaffold_18	1290318	1290466	1290392	g3456	1979	voltage-gated sodium channel	gastrula
scaffold_18	1292252	1292490	1292371	g3456	3913	voltage-gated sodium channel	gastrula
scaffold_18	1292851	1293089	1292970	g3456	4512	voltage-gated sodium channel	gastrula
scaffold_18	1470050	1470282	1470166	g3473	776	NA	planula
scaffold_180	157567	157805	157686	g14996	5271	fk506-binding protein 15	gastrula
scaffold_181	108707	108939	108823	g15032	1226	disabled homolog 2 interacting protein	planula
scaffold_181	109088	109320	109204	g15032	845	disabled homolog 2 interacting protein	planula
scaffold_181	115029	115261	115145	g15032	4864	disabled homolog 2 interacting protein	planula
scaffold_181	115544	115776	115660	g15032	5379	disabled homolog 2 interacting protein	gastrula and planula
scaffold_181	115788	116020	115904	g15032	5623	disabled homolog 2 interacting protein	gastrula and planula
scaffold_181	116776	117014	116895	g15033	5911	NA	gastrula
scaffold_181	118986	119224	119105	g15033	3701	NA	gastrula
scaffold_181	319858	320090	319974	g15045	4655	membrane associated protein	planula
scaffold_182	19039	19271	19155	aug11_g17769	20875	---NA---	planula
scaffold_182	22567	22799	22683	aug11_g17769	17347	---NA---	planula
scaffold_182	156539	156771	156655	g15062	524	forkhead box n4	gastrula and planula
scaffold_182	157441	157673	157557	g15062	1426	forkhead box n4	gastrula and planula
scaffold_182	158445	158779	158612	g15062	2430	forkhead box n4	planula
scaffold_182	259067	259299	259183	g15068	1073	ephrin precursor	planula
scaffold_182	259660	259892	259776	g15068	480	ephrin precursor	planula
scaffold_182	415582	415814	415698	g15075	6867	rho gtpase-activating protein 39 isoform 2	gastrula and planula
scaffold_182	423196	423434	423315	g15076	384	microtubule-associated protein 1 light chain 3 alpha	gastrula
scaffold_183	41043	41275	41159	aug11_g17817	2878	doublesex and mab-3 related transcription factor 5	planula
scaffold_183	43287	43519	43403	aug11_g17817	5122	doublesex and mab-3 related transcription factor 5	gastrula and planula
scaffold_183	44264	44496	44380	aug11_g17817	6099	doublesex and mab-3 related transcription factor 5	planula
scaffold_183	47902	48134	48018	g15087	7182	NA	planula
scaffold_183	63983	64131	64057	g15087	8667	NA	gastrula
scaffold_183	64994	65226	65110	g15087	9678	NA	gastrula and planula
scaffold_183	80536	80768	80652	g15088	5127	ras-associated and pleckstrin homology domains-containing protein 1-like	planula
scaffold_183	169853	170085	169969	g15095	3938	homeobox protein otx1-like	planula
scaffold_183	172295	172527	172411	g15095	6380	homeobox protein otx1-like	planula
scaffold_183	174152	174384	174268	g15096	5656	homeobox protein otx1-like	planula
scaffold_183	174730	175064	174897	g15096	4976	homeobox protein otx1-like	planula
scaffold_183	176592	176926	176759	g15096	3114	homeobox protein otx1-like	planula
scaffold_183	176891	177225	177058	g15096	2815	homeobox protein otx1-like	planula
scaffold_183	178104	178336	178220	g15096	1704	homeobox protein otx1-like	gastrula and planula
scaffold_183	180897	181129	181013	g15096	857	homeobox protein otx1-like	gastrula and planula
scaffold_183	182119	182351	182235	g15096	2079	homeobox protein otx1-like	gastrula and planula
scaffold_183	182619	182851	182735	g15096	2579	homeobox protein otx1-like	gastrula and planula
scaffold_183	183589	183821	183705	g15096	3549	homeobox protein otx1-like	planula
scaffold_183	183777	184009	183893	g15096	3737	homeobox protein otx1-like	gastrula and planula
scaffold_183	191677	191909	191793	g15097	11151	homeobox protein otx1-like	planula
scaffold_183	191923	192155	192039	g15097	10905	homeobox protein otx1-like	planula
scaffold_183	192749	193083	192916	g15097	9977	homeobox protein otx1-like	planula
scaffold_183	199611	199843	199727	g15097	3217	homeobox protein otx1-like	planula
scaffold_183	210081	210415	210248	g15097	7021	homeobox protein otx1-like	planula
scaffold_183	213796	214028	213912	g15097	10736	homeobox protein otx1-like	planula
scaffold_183	214676	214908	214792	g15097	11616	homeobox protein otx1-like	gastrula and planula
scaffold_183	216041	216273	216157	g15097	12981	homeobox protein otx1-like	planula
scaffold_183	216379	216617	216498	g15097	13319	homeobox protein otx1-like	gastrula
scaffold_183	216686	216918	216802	g15097	13626	homeobox protein otx1-like	gastrula and planula
scaffold_183	217220	217452	217336	g15097	14160	homeobox protein otx1-like	gastrula and planula
scaffold_183	217574	217806	217690	g15097	14514	homeobox protein otx1-like	planula
scaffold_183	249614	249846	249730	aug11_g17835	555	frizzled-1 precursor	planula
scaffold_185	153479	153813	153646	g15161	482	NA	planula
scaffold_185	174409	174641	174525	aug11_g17901	9245	insulinoma-associated 1	gastrula and planula
scaffold_185	175473	175705	175589	aug11_g17901	8181	insulinoma-associated 1	gastrula and planula
scaffold_185	176039	176271	176155	aug11_g17901	7615	insulinoma-associated 1	gastrula and planula
scaffold_185	177621	177853	177737	aug11_g17901	6033	insulinoma-associated 1	planula
scaffold_185	179136	179470	179303	aug11_g17901	4416	insulinoma-associated 1	planula
scaffold_185	183331	183563	183447	aug11_g17901	323	insulinoma-associated 1	gastrula and planula
scaffold_185	190678	190910	190794	aug11_g17901	6792	insulinoma-associated 1	planula
scaffold_185	271530	271762	271646	g15167	3274	rna-binding protein nova-1 isoform 2	planula
scaffold_185	391852	392084	391968	g15179	6076	NA	gastrula and planula
scaffold_185	397583	397815	397699	g15179	345	NA	planula
scaffold_185	442973	443205	443089	g15183	1583	mitochondrial carnitine acylcarnitine carrier protein cacl	gastrula and planula
scaffold_186	238693	238925	238809	aug11_g17956	5862	tyramine isoform a	planula
scaffold_186	243931	244163	244047	aug11_g17956	11100	tyramine isoform a	planula
scaffold_186	266203	266435	266319	g15201	694	endoribonuclease dicer-like	planula
scaffold_186	414457	414791	414624	g15213	1347	myosin viia	planula
scaffold_187	258540	258772	258656	g15228	776	NA	gastrula and planula
scaffold_187	277104	277336	277220	g15229	12156	NA	planula
scaffold_187	281178	281410	281294	g15230	9538	serine threonine-protein kinase h1	planula
scaffold_187	288390	288622	288506	g15230	2326	serine threonine-protein kinase h1	planula
scaffold_187	289322	289554	289438	g15230	1394	serine threonine-protein kinase h1	gastrula and planula
scaffold_187	289791	290023	289907	g15230	925	serine threonine-protein kinase h1	planula
scaffold_187	290312	290544	290428	g15230	404	serine threonine-protein kinase h1	planula
scaffold_187	291931	292169	292050	g15230	983	serine threonine-protein kinase h1	gastrula
scaffold_187	391948	392180	392064	g15239	791	NA	gastrula and planula
scaffold_187	407411	407643	407527	aug11_g18005	1220	ankyrin repeat-containing protein	gastrula and planula
scaffold_188	164823	165055	164939	g15255	3182	NA	gastrula and planula
scaffold_188	198129	198277	198203	g15256	25390	protein kinase c epsilon type	gastrula
scaffold_188	248064	248296	248180	aug11_g18027	2637	NA	planula
scaffold_188	253840	254072	253956	aug11_g18028	3444	NA	gastrula and planula
scaffold_188	254129	254277	254203	aug11_g18028	3239	NA	gastrula
scaffold_188	254500	254732	254616	aug11_g18028	2784	NA	gastrula and planula
scaffold_188	258282	258514	258398	aug11_g18028	766	NA	gastrula and planula
scaffold_188	258576	258808	258692	aug11_g18028	1060	NA	gastrula and planula
scaffold_188	258870	259102	258986	aug11_g18028	1354	NA	planula
scaffold_188	274103	274251	274177	g15259	425	NA	gastrula
scaffold_188	309052	309284	309168	g15263	491	deleted in malignant brain tumors 1	gastrula and planula
scaffold_188	372612	372850	372731	g15271	1514	NA	gastrula
scaffold_189	70452	70684	70568	g15284	1431	NA	planula
scaffold_189	149912	150144	150028	g15292	2187	NA	planula
scaffold_189	161243	161475	161359	g15292	13518	NA	planula
scaffold_189	179645	179877	179761	g15293	15828	tachykinin-like receptor at isoform b	planula
scaffold_189	230253	230485	230369	g15294	12958	gastric triacylglycerol lipase	planula
scaffold_189	230546	230778	230662	g15294	13251	gastric triacylglycerol lipase	planula
scaffold_19	389286	389518	389402	g3502	3401	hormonally up-regulated neu tumor-associated kinase	gastrula and planula
scaffold_19	522131	522465	522298	g3512	2440	NA	planula
scaffold_19	602679	602917	602798	g3517	13210	acetyl- mitochondrial precursor	gastrula
scaffold_19	603043	603275	603159	g3517	12852	acetyl- mitochondrial precursor	gastrula and planula
scaffold_19	605759	605991	605875	g3517	10136	acetyl- mitochondrial precursor	planula
scaffold_19	713097	713329	713213	g3525	1318	NA	planula
scaffold_19	726543	726775	726659	g3527	1531	NA	gastrula and planula
scaffold_19	726821	727155	726988	g3527	1151	NA	gastrula and planula
scaffold_19	781976	782208	782092	g3530	1729	NA	gastrula and planula
scaffold_19	782775	783007	782891	aug11_g4022	1917	endonuclease-reverse transcriptase	gastrula and planula
scaffold_19	783356	783588	783472	aug11_g4022	1336	endonuclease-reverse transcriptase	planula
scaffold_19	829392	829624	829508	g3533	455	NA	gastrula and planula
scaffold_19	845885	846117	846001	g3535	2420	t-box 15	planula
scaffold_19	846758	846990	846874	g3535	1547	t-box 15	planula
scaffold_19	847468	847700	847584	g3535	837	t-box 15	gastrula and planula
scaffold_19	949878	950026	949952	g3543	18577	e3 ubiquitin-protein ligase listerin	gastrula
scaffold_19	1021659	1021891	1021775	g3551	432	NA	planula
scaffold_19	1196597	1196829	1196713	g3563	2140	NA	planula
scaffold_19	1305509	1305843	1305676	g3571	6430	NA	planula
scaffold_19	1305890	1306122	1306006	g3571	6811	NA	gastrula and planula
scaffold_19	1306192	1306424	1306308	g3571	7113	NA	planula
scaffold_19	1308608	1308840	1308724	g3571	9529	NA	gastrula and planula
scaffold_19	1309273	1309421	1309347	g3571	10194	NA	gastrula
scaffold_19	1309668	1309900	1309784	g3571	10589	NA	gastrula and planula
scaffold_19	1313118	1313350	1313234	g3571	14039	NA	gastrula and planula
scaffold_19	1313325	1313557	1313441	g3571	14246	NA	gastrula and planula
scaffold_19	1313590	1313822	1313706	g3571	14511	NA	gastrula and planula
scaffold_19	1314538	1314770	1314654	g3572	13718	low quality protein: pr domain zinc finger protein 13-like	gastrula and planula
scaffold_19	1315154	1315386	1315270	g3572	13102	low quality protein: pr domain zinc finger protein 13-like	gastrula and planula
scaffold_19	1317389	1317621	1317505	g3572	10867	low quality protein: pr domain zinc finger protein 13-like	gastrula and planula
scaffold_19	1341927	1342159	1342043	g3573	4499	egl nine homolog 1	planula
scaffold_19	1342178	1342410	1342294	g3573	4248	egl nine homolog 1	planula
scaffold_19	1348028	1348260	1348144	g3573	1370	egl nine homolog 1	planula
scaffold_19	1348452	1348684	1348568	g3573	1794	egl nine homolog 1	gastrula and planula
scaffold_19	1348752	1348984	1348868	g3573	2094	egl nine homolog 1	gastrula and planula
scaffold_19	1349002	1349234	1349118	g3573	2344	egl nine homolog 1	planula
scaffold_19	1349410	1349642	1349526	g3573	2752	egl nine homolog 1	gastrula and planula
scaffold_19	1350018	1350250	1350134	g3573	3360	egl nine homolog 1	gastrula and planula
scaffold_19	1386773	1387005	1386889	g3576	1223	NA	planula
scaffold_190	207359	207507	207433	g15323	1032	NA	gastrula
scaffold_190	209005	209243	209124	g15323	466	NA	gastrula
scaffold_190	253179	253411	253295	g15328	7619	myc protein	planula
scaffold_190	254032	254264	254148	g15328	6766	myc protein	gastrula and planula
scaffold_190	254504	254736	254620	g15328	6294	myc protein	gastrula and planula
scaffold_190	257823	258055	257939	g15328	2975	myc protein	planula
scaffold_190	258052	258284	258168	g15328	2746	myc protein	planula
scaffold_190	259263	259495	259379	g15328	1535	myc protein	planula
scaffold_190	259551	259699	259625	g15328	1331	myc protein	gastrula
scaffold_190	260266	260498	260382	g15328	532	myc protein	gastrula and planula
scaffold_190	264270	264502	264386	g15328	3240	myc protein	planula
scaffold_190	265674	265906	265790	g15328	4644	myc protein	planula
scaffold_190	266103	266335	266219	g15328	5073	myc protein	planula
scaffold_190	266665	266897	266781	g15329	5563	calcium calmodulin-dependent protein kinase kinase 2 isoform 1	planula
scaffold_190	267666	267898	267782	g15329	4562	calcium calmodulin-dependent protein kinase kinase 2 isoform 1	planula
scaffold_191	84473	84711	84592	g15349	7597	carbohydrate sulfotransferase 1-like	gastrula
scaffold_191	85637	85869	85753	g15349	8761	carbohydrate sulfotransferase 1-like	planula
scaffold_191	86059	86291	86175	aug11_g18129	8445	NA	planula
scaffold_191	172572	172804	172688	g15357	1591	homeobox protein unc-4 homolog	planula
scaffold_191	248783	249015	248899	g15364	7243	ca- isoform b	planula
scaffold_191	367853	368085	367969	g15379	583	NA	planula
scaffold_191	370361	370593	370477	g15380	952	NA	planula
scaffold_192	12674	12822	12748	g15389	7664	NA	gastrula
scaffold_192	119298	119530	119414	g15395	20095	orphan g protein-coupled receptor ren 1	gastrula and planula
scaffold_192	135968	136206	136087	g15395	3419	orphan g protein-coupled receptor ren 1	gastrula
scaffold_192	140578	140810	140694	g15395	953	orphan g protein-coupled receptor ren 1	planula
scaffold_192	197642	197790	197716	g15402	6902	dual specificity phosphatase 19	gastrula
scaffold_192	198551	198783	198667	g15402	7811	dual specificity phosphatase 19	planula
scaffold_192	324369	324601	324485	g15411	359	NA	planula
scaffold_192	325677	325909	325793	g15411	717	NA	planula
scaffold_192	327128	327360	327244	g15411	2168	NA	planula
scaffold_192	329663	329895	329779	g15412	4096	tpa_inf: venus kinase receptor	planula
scaffold_192	329884	330116	330000	g15412	3875	tpa_inf: venus kinase receptor	planula
scaffold_193	126917	127149	127033	g15433	777	NA	gastrula and planula
scaffold_193	173776	174008	173892	aug11_g18239	7645	NA	planula
scaffold_193	197219	197451	197335	g15439	905	fibroblast growth factor receptor 1	planula
scaffold_193	210449	210681	210565	g15440	754	zeta-sarcoglycan	planula
scaffold_193	235440	235672	235556	aug11_g18246	1106	homeobox protein	planula
scaffold_193	271143	271375	271259	aug11_g18249	789	hrh2 protein	gastrula and planula
scaffold_193	274785	274933	274859	aug11_g18249	4431	hrh2 protein	gastrula
scaffold_193	275210	275442	275326	aug11_g18249	4856	hrh2 protein	gastrula and planula
scaffold_193	329904	330136	330020	g15446	1028	NA	gastrula and planula
scaffold_193	331049	331197	331123	g15446	2173	NA	gastrula
scaffold_193	331306	331538	331422	g15446	2430	NA	planula
scaffold_194	88507	88739	88623	g15459	352	acetylcholinesterase precursor	gastrula and planula
scaffold_194	141369	141601	141485	g15463	5205	protein capicua homolog	planula
scaffold_194	141614	141948	141781	g15463	4858	protein capicua homolog	planula
scaffold_194	159577	159809	159693	g15464	2477	ferritin	planula
scaffold_194	177199	177533	177366	g15465	1249	transcription factor rfx4	gastrula and planula
scaffold_194	178225	178457	178341	g15465	2275	transcription factor rfx4	gastrula and planula
scaffold_194	179633	179865	179749	g15465	3683	transcription factor rfx4	gastrula and planula
scaffold_194	180957	181189	181073	g15465	5007	transcription factor rfx4	planula
scaffold_194	205569	205801	205685	g15467	439	cyclic nucleotide gated channel alpha 3	planula
scaffold_194	210438	210670	210554	g15467	4198	cyclic nucleotide gated channel alpha 3	planula
scaffold_194	277457	277689	277573	g15471	3617	NA	planula
scaffold_194	278939	279171	279055	g15471	5099	NA	gastrula and planula
scaffold_194	279354	279586	279470	g15471	5514	NA	planula
scaffold_194	279974	280206	280090	g15471	6134	NA	planula
scaffold_194	282467	282699	282583	g15471	8627	NA	gastrula and planula
scaffold_194	283655	283887	283771	g15471	9815	NA	gastrula and planula
scaffold_194	286774	287006	286890	g15471	12934	NA	gastrula and planula
scaffold_194	286967	287199	287083	g15471	13127	NA	gastrula and planula
scaffold_194	287831	288063	287947	g15472	12466	yes-associated protein 1	gastrula and planula
scaffold_194	288074	288306	288190	g15472	12223	yes-associated protein 1	gastrula and planula
scaffold_194	288400	288632	288516	g15472	11897	yes-associated protein 1	planula
scaffold_194	289375	289607	289491	g15472	10922	yes-associated protein 1	planula
scaffold_194	289633	289865	289749	g15472	10664	yes-associated protein 1	planula
scaffold_194	291672	291904	291788	g15472	8625	yes-associated protein 1	planula
scaffold_194	423445	423677	423561	g15483	2922	transmembrane serine 9	planula
scaffold_194	423602	423834	423718	g15483	3079	transmembrane serine 9	gastrula and planula
scaffold_194	426757	426989	426873	g15483	6234	transmembrane serine 9	gastrula and planula
scaffold_194	433660	433892	433776	g15484	5292	NA	planula
scaffold_194	434142	434374	434258	g15484	4810	NA	planula
scaffold_195	135387	135619	135503	g15492	877	low quality protein: protein diaphanous homolog 1	planula
scaffold_195	175456	175688	175572	g15498	399	NA	planula
scaffold_195	180143	180375	180259	g15498	4056	NA	planula
scaffold_195	221502	221734	221618	g15506	3063	formin isoform a	planula
scaffold_195	250483	250715	250599	g15508	1141	NA	planula
scaffold_195	253608	253840	253724	g15509	351	NA	planula
scaffold_195	264467	264699	264583	aug11_g18332	1853	NA	planula
scaffold_195	268869	269017	268943	aug11_g18332	2317	NA	gastrula
scaffold_195	348387	348619	348503	aug11_g18341	3769	NA	gastrula and planula
scaffold_195	348827	348975	348901	aug11_g18341	4209	NA	gastrula
scaffold_195	403031	403263	403147	g15520	1222	kinase d-interacting substrate of 220 kda-like	gastrula and planula
scaffold_195	418058	418290	418174	g15520	16249	kinase d-interacting substrate of 220 kda-like	planula
scaffold_196	34735	34967	34851	g15526	1119	NA	planula
scaffold_196	269920	270152	270036	g15540	1106	NA	planula
scaffold_196	364627	364775	364701	g15550	5271	NA	gastrula
scaffold_196	380392	380624	380508	aug11_g18382	979	NA	planula
scaffold_1969	1664	1896	1780	g22691	1640	krueppel-like factor 3	planula
scaffold_1969	2135	2367	2251	g22691	1169	krueppel-like factor 3	gastrula and planula
scaffold_1969	2593	2825	2709	g22691	711	krueppel-like factor 3	planula
scaffold_1969	2848	3080	2964	g22691	456	krueppel-like factor 3	planula
scaffold_197	54253	54491	54372	g15561	4675	NA	gastrula
scaffold_197	54906	55054	54980	g15561	4112	NA	gastrula
scaffold_197	55068	55216	55142	g15561	3950	NA	gastrula
scaffold_197	55834	56066	55950	g15561	3100	NA	planula
scaffold_197	56113	56345	56229	g15561	2821	NA	planula
scaffold_197	58348	58580	58464	g15561	586	NA	gastrula and planula
scaffold_197	58572	58804	58688	g15561	362	NA	gastrula and planula
scaffold_197	78506	78654	78580	g15563	4830	NA	gastrula
scaffold_197	203632	203870	203751	aug11_g18408	2071	NA	gastrula
scaffold_197	208904	209238	209071	aug11_g18409	1363	NA	planula
scaffold_197	297310	297542	297426	g15578	1004	NA	planula
scaffold_197	343293	343525	343409	g15584	616	phosphatidylinositol 4-kinase type 2-alpha	gastrula and planula
scaffold_197	366504	366742	366623	g15586	360	NA	gastrula
scaffold_197	379965	380197	380081	g15586	12863	NA	planula
scaffold_197	383444	383676	383560	g15586	16342	NA	planula
scaffold_197	384255	384487	384371	g15586	17153	NA	planula
scaffold_197	384522	384754	384638	g15586	17420	NA	planula
scaffold_198	1903	2135	2019	g15588	19310	NA	planula
scaffold_198	21786	22018	21902	g15588	341	NA	planula
scaffold_198	55051	55283	55167	g15591	3982	NA	gastrula and planula
scaffold_198	55312	55544	55428	g15591	3721	NA	gastrula and planula
scaffold_198	55758	55990	55874	g15591	3275	NA	planula
scaffold_198	56409	56641	56525	g15591	2624	NA	gastrula and planula
scaffold_198	232602	232834	232718	g15604	552	beta 6	gastrula and planula
scaffold_198	278537	278769	278653	g15605	608	metabotropic glutamate receptor 3 precursor	planula
scaffold_198	287809	288041	287925	g15606	1898	NA	gastrula and planula
scaffold_198	342272	342504	342388	g15614	2783	NA	gastrula and planula
scaffold_198	342918	343150	343034	g15614	2137	NA	planula
scaffold_198	346174	346406	346290	g15614	887	NA	gastrula and planula
scaffold_198	348108	348346	348227	g15614	2821	NA	gastrula
scaffold_198	357983	358131	358057	g15616	1416	roundabout homolog 2-like	gastrula
scaffold_199	71432	71664	71548	g15629	14106	centrosomal protein of 63 kda-like	planula
scaffold_199	77707	77945	77826	g15630	17960	a disintegrin and metalloproteinase with thrombospondin motifs 6	gastrula
scaffold_199	377308	377540	377424	g15655	9480	camp-dependent protein kinase isoform b	planula
scaffold_1997	8908	9140	9024	g22730	835	solute carrier family 15 (h+ peptide transporter) member 2	planula
scaffold_2	190742	190890	190816	g278	4277	NA	gastrula
scaffold_2	215852	216084	215968	g282	885	NA	planula
scaffold_2	226514	226746	226630	g282	9545	NA	planula
scaffold_2	233254	233486	233370	g283	4863	NA	planula
scaffold_2	233684	233916	233800	g283	4433	NA	gastrula and planula
scaffold_2	233945	234177	234061	g283	4172	NA	gastrula and planula
scaffold_2	237226	237458	237342	g283	891	NA	planula
scaffold_2	237554	237702	237628	g283	647	NA	gastrula
scaffold_2	239344	239576	239460	g283	995	NA	planula
scaffold_2	240737	240969	240853	g283	2388	NA	planula
scaffold_2	241053	241285	241169	g283	2704	NA	planula
scaffold_2	241911	242143	242027	g283	3562	NA	planula
scaffold_2	243434	243768	243601	g284	2041	carbohydrate sulfotransferase 14	planula
scaffold_2	286244	286578	286411	g288	5224	keratinocyte growth factor	gastrula and planula
scaffold_2	286724	286962	286843	g288	5704	keratinocyte growth factor	gastrula
scaffold_2	287140	287378	287259	g288	6120	keratinocyte growth factor	gastrula
scaffold_2	287393	287631	287512	g288	6373	keratinocyte growth factor	gastrula
scaffold_2	288217	288449	288333	g288	7197	keratinocyte growth factor	planula
scaffold_2	288650	288888	288769	g288	7630	keratinocyte growth factor	gastrula
scaffold_2	289532	289764	289648	g288	8512	keratinocyte growth factor	gastrula and planula
scaffold_2	290445	290593	290519	g288	9425	keratinocyte growth factor	gastrula
scaffold_2	341811	342043	341927	g294	761	tpa_inf: von willebrand factor	planula
scaffold_2	342024	342256	342140	g294	974	tpa_inf: von willebrand factor	planula
scaffold_2	355668	355900	355784	g295	629	NA	planula
scaffold_2	378493	378641	378567	aug11_g343	6545	NA	gastrula
scaffold_2	379190	379422	379306	aug11_g343	5764	NA	planula
scaffold_2	387680	387918	387799	aug11_g343	2494	NA	gastrula
scaffold_2	388451	388683	388567	g298	2025	NA	gastrula and planula
scaffold_2	390218	390366	390292	g298	342	NA	gastrula
scaffold_2	447149	447381	447265	g304	1047	NA	planula
scaffold_2	452014	452162	452088	g305	686	NA	gastrula
scaffold_2	453719	453951	453835	aug11_g352	734	protein phosphatase 1 regulatory subunit 12c	planula
scaffold_2	517724	517956	517840	g313	10082	40s ribosomal protein s23	planula
scaffold_2	732161	732495	732328	g329	438	NA	gastrula and planula
scaffold_2	808526	808860	808693	g336	673	NA	planula
scaffold_2	811271	811503	811387	g336	1738	NA	planula
scaffold_2	822284	822516	822400	aug11_g389	2818	NA	gastrula and planula
scaffold_2	822951	823183	823067	aug11_g389	2151	NA	planula
scaffold_2	838481	838713	838597	g337	9760	NA	planula
scaffold_2	897115	897353	897234	g342	8199	NA	gastrula
scaffold_2	975020	975252	975136	g350	2115	NA	planula
scaffold_2	1013451	1013683	1013567	aug11_g409	4885	ing (mammalian inhibitor of growth) homolog family member (ing-3)-like	planula
scaffold_2	1028834	1029066	1028950	g354	567	NA	gastrula and planula
scaffold_2	1029122	1029354	1029238	g355	514	grainyhead-like protein 2 homolog	gastrula and planula
scaffold_2	1080002	1080234	1080118	g360	594	dbh-like 1	planula
scaffold_2	1082003	1082235	1082119	g360	1175	dbh-like 1	planula
scaffold_2	1108338	1108570	1108454	g362	6280	NA	planula
scaffold_2	1112913	1113145	1113029	g362	1705	NA	planula
scaffold_2	1216651	1216883	1216767	g369	2457	NA	planula
scaffold_2	1216929	1217161	1217045	g369	2179	NA	planula
scaffold_2	1367006	1367238	1367122	g384	916	sparc cwcv and kazal-like domains proteoglycan 2	planula
scaffold_2	1401416	1401564	1401490	g387	5166	NA	gastrula
scaffold_2	1402640	1402872	1402756	g388	4298	paired-like homeodomain 2	planula
scaffold_2	1403154	1403386	1403270	g388	3784	paired-like homeodomain 2	planula
scaffold_2	1405726	1405958	1405842	g388	1212	paired-like homeodomain 2	planula
scaffold_2	1406146	1406378	1406262	g388	792	paired-like homeodomain 2	gastrula and planula
scaffold_2	1411216	1411448	1411332	g388	4046	paired-like homeodomain 2	planula
scaffold_2	1411616	1411950	1411783	g388	4446	paired-like homeodomain 2	gastrula and planula
scaffold_2	1414823	1415055	1414939	g388	7653	paired-like homeodomain 2	planula
scaffold_2	1415322	1415560	1415441	g388	8152	paired-like homeodomain 2	gastrula
scaffold_2	1424126	1424358	1424242	g388	16956	paired-like homeodomain 2	planula
scaffold_2	1425297	1425529	1425413	g388	18127	paired-like homeodomain 2	gastrula and planula
scaffold_2	1428226	1428458	1428342	g389	15211	wd-40 repeat protein	gastrula and planula
scaffold_2	1428559	1428791	1428675	g389	14878	wd-40 repeat protein	planula
scaffold_2	1477211	1477443	1477327	g394	1631	mitochondria-eating protein	gastrula and planula
scaffold_2	1477685	1477833	1477759	g394	2105	mitochondria-eating protein	gastrula
scaffold_2	1572602	1572834	1572718	g402	978	NA	gastrula and planula
scaffold_2	1572901	1573049	1572975	g402	1277	NA	gastrula
scaffold_2	1672551	1672885	1672718	g415	3910	NA	gastrula and planula
scaffold_2	1675715	1675947	1675831	g415	848	NA	planula
scaffold_2	1678020	1678168	1678094	g415	1225	NA	gastrula
scaffold_2	1678572	1678804	1678688	g415	1777	NA	gastrula and planula
scaffold_2	1682726	1682958	1682842	g415	5931	NA	planula
scaffold_2	1684920	1685152	1685036	g415	8125	NA	gastrula and planula
scaffold_2	1685299	1685447	1685373	g415	8504	NA	gastrula
scaffold_2	1689360	1689592	1689476	g416	7574	transmembrane protein 77	planula
scaffold_2	1689597	1689745	1689671	g416	7421	transmembrane protein 77	gastrula
scaffold_2	1692531	1692763	1692647	g416	4403	transmembrane protein 77	gastrula and planula
scaffold_2	1692992	1693224	1693108	g416	3942	transmembrane protein 77	planula
scaffold_2	1693833	1694065	1693949	g416	3101	transmembrane protein 77	planula
scaffold_2	1694401	1694633	1694517	g416	2533	transmembrane protein 77	planula
scaffold_2	1694963	1695195	1695079	g416	1971	transmembrane protein 77	planula
scaffold_2	1695372	1695604	1695488	g416	1562	transmembrane protein 77	gastrula and planula
scaffold_2	1705709	1705941	1705825	aug11_g481	6974	n-acetyltransferase c7orf52-like	planula
scaffold_2	1740475	1740707	1740591	g418	319	NA	planula
scaffold_2	1742426	1742574	1742500	g418	2270	NA	gastrula
scaffold_2	1871579	1871913	1871746	g429	5026	NA	planula
scaffold_2	2035325	2035563	2035444	g441	2724	NA	gastrula
scaffold_2	2081515	2081747	2081631	g445	1978	protein dok-7	planula
scaffold_2	2082666	2082814	2082740	g446	3103	NA	gastrula
scaffold_2	2087556	2087704	2087630	aug11_g511	415	NA	gastrula
scaffold_2	2146536	2146870	2146703	aug11_g521	1815	NA	planula
scaffold_2	2162487	2162719	2162603	g457	340	prickle-like protein 2	gastrula and planula
scaffold_2	2162747	2162979	2162863	g457	600	prickle-like protein 2	planula
scaffold_2	2163094	2163326	2163210	g457	947	prickle-like protein 2	gastrula and planula
scaffold_2	2163371	2163603	2163487	g457	1224	prickle-like protein 2	gastrula and planula
scaffold_2	2164521	2164753	2164637	g457	2374	prickle-like protein 2	planula
scaffold_2	2166059	2166291	2166175	g457	3912	prickle-like protein 2	gastrula and planula
scaffold_2	2167356	2167594	2167475	g457	5209	prickle-like protein 2	gastrula
scaffold_2	2168105	2168253	2168179	g457	5958	prickle-like protein 2	gastrula
scaffold_2	2168761	2168993	2168877	g457	6614	prickle-like protein 2	gastrula and planula
scaffold_2	2169064	2169296	2169180	g457	6917	prickle-like protein 2	planula
scaffold_2	2169801	2170033	2169917	g457	7654	prickle-like protein 2	planula
scaffold_2	2171119	2171351	2171235	aug11_g526	7930	protein prickle	gastrula and planula
scaffold_2	2222691	2222923	2222807	aug11_g532	11628	NA	planula
scaffold_2	2226108	2226340	2226224	aug11_g532	8211	NA	gastrula and planula
scaffold_2	2227077	2227309	2227193	aug11_g532	7242	NA	gastrula and planula
scaffold_2	2231579	2231811	2231695	aug11_g532	2740	NA	planula
scaffold_2	2232235	2232467	2232351	aug11_g532	2084	NA	planula
scaffold_2	2240837	2241069	2240953	g462	711	gata binding protein isoform cra_a	planula
scaffold_2	2245377	2245609	2245493	aug11_g533	415	NA	planula
scaffold_2	2246069	2246301	2246185	aug11_g533	1107	NA	gastrula and planula
scaffold_2	2246567	2246799	2246683	aug11_g533	1605	NA	planula
scaffold_2	2247118	2247350	2247234	aug11_g533	2156	NA	planula
scaffold_2	2247360	2247694	2247527	aug11_g533	2398	NA	planula
scaffold_2	2249578	2249810	2249694	aug11_g533	4616	NA	planula
scaffold_2	2252719	2252951	2252835	aug11_g533	7757	NA	planula
scaffold_2	2255286	2255518	2255402	aug11_g533	10324	NA	planula
scaffold_2	2267018	2267250	2267134	g463	9536	NA	planula
scaffold_2	2353008	2353246	2353127	g472	449	NA	gastrula
scaffold_2	2364416	2364648	2364532	aug11_g549	3499	NA	planula
scaffold_2	2365074	2365306	2365190	aug11_g549	2841	NA	planula
scaffold_2	2435564	2435898	2435731	g480	581	solute carrier family member 6	gastrula and planula
scaffold_2	2473905	2474137	2474021	g484	2236	guanine nucleotide-binding protein g subunit alpha-1	planula
scaffold_2	2474347	2474579	2474463	g484	1794	guanine nucleotide-binding protein g subunit alpha-1	planula
scaffold_2	2474758	2474990	2474874	g484	1383	guanine nucleotide-binding protein g subunit alpha-1	planula
scaffold_2	2520296	2520528	2520412	g488	5635	NA	planula
scaffold_2	2520858	2521090	2520974	g488	5073	NA	gastrula and planula
scaffold_2	2525432	2525664	2525548	g488	499	NA	planula
scaffold_2	2531141	2531373	2531257	g488	4978	NA	planula
scaffold_2	2531951	2532183	2532067	g488	5788	NA	gastrula and planula
scaffold_2	2604067	2604401	2604234	aug11_g578	312	---NA---	gastrula and planula
scaffold_2	2687964	2688196	2688080	g500	1153	NA	gastrula and planula
scaffold_2	2688779	2689017	2688898	g500	332	NA	gastrula
scaffold_2	2780872	2781110	2780991	g508	853	dna damage-regulated autophagy modulator protein 2	gastrula
scaffold_2	2781146	2781378	2781262	g508	585	dna damage-regulated autophagy modulator protein 2	planula
scaffold_20	109110	109342	109226	g3605	5165	NA	planula
scaffold_20	111144	111376	111260	g3605	7199	NA	planula
scaffold_20	114471	114703	114587	g3606	6733	NA	planula
scaffold_20	115224	115558	115391	g3606	5878	NA	planula
scaffold_20	149367	149515	149441	g3608	4361	calmodulin	gastrula
scaffold_20	219788	220020	219904	g3619	630	solute carrier family 22 member 5	planula
scaffold_20	393539	393771	393655	g3636	665	NA	planula
scaffold_20	410023	410357	410190	g3640	2656	nek (never in mitosis kinase) like family member (nekl-1)	gastrula and planula
scaffold_20	576477	576709	576593	g3657	852	g protein-coupled receptor 161	planula
scaffold_20	683530	683762	683646	g3665	373	calmodulin	gastrula and planula
scaffold_20	874886	875118	875002	g3689	1125	apobec1 complementation factor isoform 2	planula
scaffold_20	875152	875384	875268	g3689	859	apobec1 complementation factor isoform 2	gastrula and planula
scaffold_20	875553	875785	875669	g3689	458	apobec1 complementation factor isoform 2	gastrula and planula
scaffold_20	995741	996075	995908	g3703	4208	NA	planula
scaffold_20	1008665	1008999	1008832	g3704	2001	NA	planula
scaffold_20	1018433	1018665	1018549	g3705	835	steroid 17-alpha-hydroxylase lyase-like	planula
scaffold_20	1049316	1049464	1049390	g3708	1897	distal-less homeobox 1	gastrula
scaffold_20	1050233	1050381	1050307	g3708	980	distal-less homeobox 1	gastrula
scaffold_20	1053325	1053557	1053441	g3708	1964	distal-less homeobox 1	gastrula and planula
scaffold_20	1054394	1054626	1054510	g3708	3033	distal-less homeobox 1	planula
scaffold_20	1056157	1056389	1056273	g3708	4796	distal-less homeobox 1	gastrula and planula
scaffold_20	1064901	1065235	1065068	g3709	1141	NA	planula
scaffold_20	1137574	1137806	1137690	g3716	424	upf0760 protein c2orf29-like	planula
scaffold_20	1270516	1270748	1270632	g3736	639	NA	planula
scaffold_20	1328298	1328530	1328414	g3742	7188	zinc finger protein 431	planula
scaffold_20	1330454	1330686	1330570	g3742	5032	zinc finger protein 431	gastrula and planula
scaffold_20	1331002	1331234	1331118	g3742	4484	zinc finger protein 431	planula
scaffold_20	1331241	1331473	1331357	g3742	4245	zinc finger protein 431	planula
scaffold_20	1331821	1332053	1331937	g3742	3665	zinc finger protein 431	planula
scaffold_20	1333385	1333623	1333504	g3742	2095	zinc finger protein 431	gastrula
scaffold_20	1334167	1334405	1334286	g3742	1313	zinc finger protein 431	gastrula
scaffold_20	1334479	1334717	1334598	g3742	1001	zinc finger protein 431	gastrula
scaffold_20	1334945	1335177	1335061	g3742	541	zinc finger protein 431	planula
scaffold_20	1335177	1335409	1335293	g3742	309	zinc finger protein 431	planula
scaffold_20	1340734	1340972	1340853	g3742	5016	zinc finger protein 431	gastrula
scaffold_20	1341819	1342057	1341938	g3742	6101	zinc finger protein 431	gastrula
scaffold_20	1342181	1342419	1342300	g3742	6463	zinc finger protein 431	gastrula
scaffold_20	1344704	1344852	1344778	g3743	5444	NA	gastrula
scaffold_200	283305	283537	283421	g15675	1557	NA	gastrula and planula
scaffold_200	284145	284377	284261	g15675	717	NA	gastrula and planula
scaffold_200	319724	319872	319798	g15679	363	NA	gastrula
scaffold_200	376524	376756	376640	g15684	6741	a-kinase anchor protein mitochondrial	gastrula and planula
scaffold_200	393276	393508	393392	g15686	1238	NA	gastrula and planula
scaffold_200	393653	393987	393820	g15686	1615	NA	planula
scaffold_200	394458	394690	394574	g15686	2420	NA	planula
scaffold_201	89716	89948	89832	g15703	1638	NA	planula
scaffold_201	118086	118318	118202	g15707	408	NA	gastrula and planula
scaffold_201	275584	275816	275700	g15718	7505	neuropilin 2a	gastrula and planula
scaffold_201	277220	277452	277336	g15718	5869	neuropilin 2a	gastrula and planula
scaffold_202	17338	17672	17505	g15729	3462	NA	planula
scaffold_202	149980	150212	150096	g15744	304	NA	planula
scaffold_202	184223	184455	184339	g15746	368	chitin synthase 1	gastrula and planula
scaffold_202	241837	242069	241953	g15752	1949	NA	planula
scaffold_202	242229	242461	242345	g15752	2341	NA	planula
scaffold_202	302352	302584	302468	g15757	1854	NA	gastrula and planula
scaffold_202	407869	408101	407985	g15775	722	endothelin converting enzyme 1	planula
scaffold_202	408137	408369	408253	g15775	454	endothelin converting enzyme 1	planula
scaffold_202	409341	409573	409457	g15775	518	endothelin converting enzyme 1	planula
scaffold_202	415996	416330	416163	g15776	4993	NA	planula
scaffold_203	55987	56219	56103	g15779	5651	alpha beta hydrolase fold protein	planula
scaffold_203	56496	56728	56612	g15779	6160	alpha beta hydrolase fold protein	planula
scaffold_203	56809	57143	56976	g15779	6473	alpha beta hydrolase fold protein	planula
scaffold_203	57727	57959	57843	g15779	7391	alpha beta hydrolase fold protein	planula
scaffold_203	77067	77299	77183	g15781	2182	NA	planula
scaffold_203	78350	78582	78466	g15781	3465	NA	gastrula and planula
scaffold_203	261355	261587	261471	g15795	329	beta-adrenergic receptor kinase 2	planula
scaffold_203	262244	262578	262411	g15795	1218	beta-adrenergic receptor kinase 2	gastrula and planula
scaffold_203	328664	328896	328780	g15800	2779	NA	planula
scaffold_203	329165	329397	329281	g15800	2278	NA	planula
scaffold_203	330335	330567	330451	g15800	1108	NA	planula
[truncated: 3,748 more rows]
